# Supplementary material for: Stereoselective synthesis, structural aspects, and NMR properties of stable C-fluorinated phosphaalkenes
Source: Royal Society of Chemistry journal article supplement (doi:10.1039/c3cc45237a), 2013-01-01
Supplement: c3cc45237a.pdf [file c3cc45237a.pdf]

Stereoselective synthesis, structural aspects, and NMR properties of  
stable C-fluorinated phosphalkenes

Shigekazu Ito,\* Takeshi Nakagawa, and Koichi Mikami

Department of Applied Chemistry, Graduate School of Science and Engineering, Tokyo  
Institute of Technology

E-mail: ito.s.ao@m.titech.ac.jp

Table of Contents

|                                |    |
|--------------------------------|----|
| 1. General Information         | 2  |
| 2. Experimental Procedure      | 2  |
| 3. X-ray Crystallographic Data | 3  |
| 4. DFT calculation             | 5  |
| 5. Copies of NMR charts        | 23 |
| 6. NMR Relaxation Study        | 29 |
| References                     | 35 |

## 1. General Information

All manipulations with organolithium reagents were carried out under an argon atmosphere by means of the standard Schlenk techniques, and the employed solvents were dried by appropriate methods.  $^1\text{H}$ ,  $^{13}\text{C}\{^1\text{H}\}$  and  $^{31}\text{P}\{^1\text{H}\}$  NMR spectra were recorded on a Bruker AV300M spectrometer in  $\text{CDCl}_3$  at 298 K with internal  $\text{Me}_4\text{Si}$  ( $^1\text{H}$ ,  $^{13}\text{C}$ ) or external 85%  $\text{H}_3\text{PO}_4$  ( $^{31}\text{P}$ ) standard, respectively. Melting points were measured on an As One ATM-02 apparatus without correction. MS spectra were taken on a JEOL T100LC spectrometer. X-ray diffraction data were collected on a Rigaku RAXIS-Rapid diffractometer, and structures were solved by a direct method (SHELXL-97).<sup>1</sup> The X-ray structure solution and refinement were carried out using the Yadokari-XG software.<sup>2</sup> DFT calculations for a single and isolated species were carried out with Gaussian 09 program package.<sup>3</sup> 2,4,6-Tri-*t*-butylphenylphosphonous dichloride ( $\text{Mes}^*\text{PCl}_2$ )<sup>4</sup> and compounds **5**<sup>5</sup> and **6**<sup>6</sup> were synthesized according to the previous reports. Relaxation study was performed using the inversion recovery (IR)<sup>7</sup> and Carr-Purcell-Meiboom-Gill (CPMG)<sup>8</sup> methods for  $T_1$  and  $T_2$ , respectively.

## 2. Experimental Procedure

**1**: To a solution of 2,4,6-tri-*t*-butylphenylphosphonous dichloride ( $\text{Mes}^*\text{PCl}_2$ ; 1.10 g, 3.17 mmol) and  $\text{CBr}_3\text{F}$  (0.330 mL, 3.37 mmol) in 6 ml of THF/ $\text{Et}_2\text{O}$  (2:1) was added the first portion of  $^n\text{BuLi}$  (3.2 mmol, 1.6 M solution in hexane, 1 M = 1 mol  $\text{dm}^{-3}$ ) dropwise at  $-130\text{ }^\circ\text{C}$  over the period of 0.5 h. Then, second portion of  $^n\text{BuLi}$  (3.2 mmol) was added dropwise at  $-130\text{ }^\circ\text{C}$  over the period of 1.5 h. The solvent was removed in vacuo and residual solid was washed with hexane. The solution was concentrated in vacuo, and the residue was recrystallized from ethanol to give 0.820 g of **1** in 67% yield. Colorless needles, Mp 111–115  $^\circ\text{C}$ ;  $^1\text{H}$  NMR (300 MHz,  $\text{CDCl}_3$ )  $\delta$  7.47 (s, 2H), 1.58 (s, 18H), 1.37 (s, 9H);  $^{31}\text{P}\{^1\text{H}\}$  NMR (121 MHz,  $\text{CDCl}_3$ )  $\delta$  134.9 (d,  $^2J_{\text{PF}} = 161$  Hz);  $^{19}\text{F}$  NMR (282 MHz,  $\text{CDCl}_3$ )  $\delta$   $-8.4$  (d,  $^2J_{\text{PF}} = 161$  Hz);  $^{13}\text{C}$  NMR (75 MHz,  $\text{CDCl}_3$ )  $\delta$  164.2 (dd,  $J = 420$  Hz, 97 Hz, P=C), 154.3 (s, *o*-Mes\*), 151.3 (s, *p*-Mes\*), 128.1 (dd,  $^1J_{\text{PC}} = 50$  Hz,  $^2J_{\text{FC}} = 12$  Hz, *ipso*-Mes\*), 122.0 (s, *m*-Mes\*), 37.8 (s, *o*-CMe<sub>3</sub>), 35.2 (s, *p*-CMe<sub>3</sub>), 32.7 (*p*-CMe<sub>3</sub>), 31.3 (*o*-CMe<sub>3</sub>); APCI-MS calcd for  $\text{C}_{19}\text{H}_{29}\text{BrFP} + \text{H}$  387.1253; found:  $m/z$  387.0886.

When the reaction was performed in THF at  $-100\text{ }^\circ\text{C}$ , **1'** was also observed together with **1**.  $^{31}\text{P}\{^1\text{H}\}$  NMR (121 MHz,  $\text{CDCl}_3$ )  $\delta$  118.0 (d,  $^2J_{\text{PF}} = 160$  Hz);  $^{19}\text{F}$  NMR (282 MHz,  $\text{CDCl}_3$ )  $\delta$

-12.8 (d,  $^2J_{\text{PF}} = 161$  Hz).

**3:** To a solution of **1** (40.0 mg, 1.03 mmol) in 20 ml of THF was added  $^n\text{BuLi}$  (2.1 mmol) were added dropwise at  $-78$  °C over the period of 0.5 h. Then, methanol were added dropwise at  $-78$  °C over the period of 1 h. The volatile materials were removed in vacuo and residual solid was washed with hexane. The solution was concentrated and subjected to column chromatography ( $\text{SiO}_2$ , hexane) to give 31.7 mg of **3** (quant). Colorless crystals, Mp 65–68 °C;  $^1\text{H}$  NMR (300 MHz,  $\text{CDCl}_3$ )  $\delta$  7.44 (d,  $^4J_{\text{PH}} = 2$  Hz, 2H), 7.34 (dd, 1H,  $^2J_{\text{PH}} = 58$  Hz,  $^2J_{\text{FH}} = 73$  Hz, =CH), 1.54 (s, 18H, *o*- $t$ Bu), 1.33 (s, 9H, *p*- $t$ Bu);  $^{31}\text{P}\{^1\text{H}\}$  NMR (121 MHz,  $\text{CDCl}_3$ )  $\delta$  144.4 (dd,  $^2J_{\text{PF}} = 135$  Hz,  $^2J_{\text{PH}} = 58$  Hz);  $^{19}\text{F}$  NMR (282 MHz,  $\text{CDCl}_3$ )  $\delta$  -68.6 (dd,  $^2J_{\text{PF}} = 135$ ,  $^2J_{\text{FH}} = 73$  Hz);  $^{13}\text{C}\{^1\text{H}\}$  NMR (75 MHz,  $\text{CDCl}_3$ )  $\delta$  178.2 (dd,  $J = 290$  Hz, 60 Hz, P=C), 154.5 (s, *o*-Mes\*), 150.6 (s, *p*-Mes\*), 125.9 (dd,  $J = 48$  Hz, 15 Hz, *ipso*-Mes\*), 121.8 (s, *m*-Mes\*), 37.8 (s, *o*-CMe<sub>3</sub>), 35.0 (s, *p*-CMe<sub>3</sub>), 32.7 (d,  $^4J_{\text{PC}} = 7$  Hz, *o*-CMe<sub>3</sub>), 31.4 (s, *p*-CMe<sub>3</sub>); APCI-MS calcd for C<sub>19</sub>H<sub>30</sub>FP+H 309.2147; found:  $m/z$  309.2163.

**4:** To a solution of **1** (83.3 mg, 0.215 mmol) in 20 ml of THF was added  $^n\text{BuLi}$  (0.44 mmol) and 0.030 ml of TMEDA at  $-78$  °C over the period of 0.5 h. Then, 0.040 ml of PPh<sub>2</sub>Cl (0.22 mmol) was added dropwise at  $-78$  °C over the period of 1 h. The solvent was removed in vacuo and residual solid was washed with hexane. The solution was concentrated and subjected to column chromatography ( $\text{SiO}_2$ , hexane/AcOEt = 10:1) to give 73.2 mg of **4** (69%). Colorless crystals, Mp 70–73 °C;  $^1\text{H}$  NMR (300 MHz,  $\text{CDCl}_3$ )  $\delta$  7.51–7.26 (m, 12H), 1.42 (s, 18H), 1.29 (s, 9H);  $^{31}\text{P}\{^1\text{H}\}$  NMR (121 MHz,  $\text{CDCl}_3$ )  $\delta$  204.4 (dd,  $^2J_{\text{PP}} = 241$  Hz,  $^2J_{\text{PF}} = 145$  Hz), -3.9 (dd,  $^2J_{\text{PP}} = 241$  Hz,  $^2J_{\text{PF}} = 20$  Hz);  $^{19}\text{F}$  NMR (282 MHz,  $\text{CDCl}_3$ ):  $\delta$  -50.1 (dd,  $^2J_{\text{PF}} = 145$ , 20 Hz);  $^{13}\text{C}\{^1\text{H}\}$  NMR (75 MHz,  $\text{CDCl}_3$ )  $\delta$  153.8 (d,  $^2J_{\text{PC}} = 2$  Hz, *o*-Mes\*), 150.5 (s, *p*-Mes\*), 134.5 (ddd,  $J = 15$  Hz, 9 Hz, 2 Hz, P=C), 133.6 (d,  $^1J_{\text{PC}} = 20$  Hz, *ipso*-Mes\*), 132.7 (d,  $^1J_{\text{PC}} = 17$  Hz, *o*-Ph), 130.8 (d,  $^1J_{\text{PC}} = 17$  Hz, *ipso*-Ph), 129.0 (s, *p*-Ph), 128.4 (d,  $^1J_{\text{PC}} = 7$  Hz, *m*-Ph), 121.8 (s, *m*-Mes\*), 37.7 (s, *o*-CMe<sub>3</sub>), 35.0 (s, *p*-CMe<sub>3</sub>), 32.8 (d,  $^4J_{\text{PC}} = 7$  Hz, *o*-CMe<sub>3</sub>), 31.3 (s, *p*-CMe<sub>3</sub>); APCI-MS calcd for C<sub>31</sub>H<sub>39</sub>FP<sub>2</sub>+H 493.2589; found:  $m/z$  493.2484.

### 3. X-ray Crystallographic Data

**1:** C<sub>19</sub>H<sub>29</sub>BrFP, colorless needles ( $\text{CH}_2\text{Cl}_2$ ),  $M_w = 387.30$ , crystal dimensions = 0.29 × 0.24 ×

0.10 mm<sup>3</sup>, monoclinic, space group  $P2_1/n$  (#14), crystal dimensions = 0.29 × 0.14 × 0.11 mm<sup>3</sup>, monoclinic, space group  $P2_1/c$  (#14),  $a = 5.9989(4)$ ,  $b = 12.7211(9)$ ,  $c = 25.6766(13)$  Å,  $\beta = 95.877(7)^\circ$ ,  $V = 1949.2(2)$  Å<sup>3</sup>,  $Z = 4$ ,  $\lambda = 0.71075$  Å,  $T = 123$  K,  $\rho_{\text{calcd}} = 1.320$  g cm<sup>-3</sup>,  $\mu_{\text{MoK}\alpha} = 2.195$  mm<sup>-1</sup>,  $F_{000} = 808$ , 15220 total reflections ( $2\theta_{\text{max}} = 54.96^\circ$ ), index ranges =  $-7 \leq h \leq 7$ ,  $-15 \leq k \leq 15$ ,  $-30 \leq l \leq 30$ , 3557 unique reflections ( $R_{\text{int}} = 0.0881$ ),  $R1 = 0.0365$  ( $I \geq 2\sigma(I)$ ), 0.0542 (all data),  $wR2 = 0.0983$  ( $I \geq 2\sigma(I)$ ), 0.1124 (all data),  $S = 0.757$  (315 parameters). **4**: C<sub>31</sub>H<sub>39</sub>FP<sub>2</sub>, colorless prisms (CH<sub>2</sub>Cl<sub>2</sub>),  $M_w = 492.56$ , crystal dimensions = 0.29 × 0.24 × 0.10 mm<sup>3</sup>, monoclinic, space group  $P2_1/c$  (#14),  $a = 11.5045(6)$ ,  $b = 10.3533(4)$ ,  $c = 24.8649(13)$  Å,  $\beta = 99.7979(18)^\circ$ ,  $V = 2918.4(2)$  Å<sup>3</sup>,  $Z = 4$ ,  $\lambda = 0.71075$  Å,  $T = 123$  K,  $\rho_{\text{calcd}} = 1.121$  g cm<sup>-3</sup>,  $\mu_{\text{MoK}\alpha} = 0.172$  mm<sup>-1</sup>,  $F_{000} = 1056$ , 28245 total reflections ( $2\theta_{\text{max}} = 54.96^\circ$ ), index ranges =  $-14 \leq h \leq 12$ ,  $-13 \leq k \leq 13$ ,  $-32 \leq l \leq 32$ , 6668 unique reflections ( $R_{\text{int}} = 0.0389$ ),  $R1 = 0.0411$  ( $I > 2\sigma(I)$ ), 0.0536 (all data),  $wR2 = 0.1233$  ( $I > 2\sigma(I)$ ), 0.1379 (all data),  $S = 1.017$  (491 parameters). CCDC-948834 (**1**) and 948835 (**4**) contain the supplementary crystallographic data for this paper. These data can be obtained free of charge from the Cambridge Crystallographic Data Centre via [www.ccdc.cam.ac.uk/data\\_request/cif](http://www.ccdc.cam.ac.uk/data_request/cif).

## 4. DFT Calculation

### Int-1

# opt rcam-b3lyp/6-31g(d)

Stoichiometry C19H29Br2ClFP  
Framework group C1[X(C19H29Br2ClFP)]  
Deg. of freedom 153  
Full point group C1 NOp 1  
Largest Abelian subgroup C1 NOp 1  
Largest concise Abelian subgroup C1 NOp 1

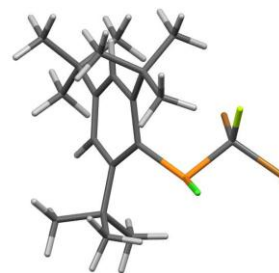

E(RCAM-B3LYP) = -6785.97592440 A.U.

Dipole moment (field-independent basis, Debye):

X= 4.1587 Y= 0.1502 Z= -0.5650 Tot= 4.1996

Standard orientation:

| Center Number | Atomic Number | Atomic Type | Coordinates (Angstroms) |           |           |
|---------------|---------------|-------------|-------------------------|-----------|-----------|
|               |               |             | X                       | Y         | Z         |
| 1             | 15            | 0           | -1.375121               | 0.952768  | 0.414761  |
| 2             | 6             | 0           | 0.359474                | 0.541530  | 0.876944  |
| 3             | 6             | 0           | 0.944435                | -0.723086 | 1.190333  |
| 4             | 6             | 0           | 2.167420                | -1.023664 | 0.598219  |
| 5             | 6             | 0           | 2.873127                | -0.143795 | -0.215158 |
| 6             | 6             | 0           | 2.405796                | 1.160337  | -0.272304 |
| 7             | 6             | 0           | 1.191410                | 1.549366  | 0.292635  |
| 8             | 6             | 0           | 0.461560                | -1.782076 | 2.214771  |
| 9             | 6             | 0           | -0.806251               | -1.416884 | 2.987078  |
| 10            | 6             | 0           | 0.269055                | -3.158596 | 1.550487  |
| 11            | 6             | 0           | 1.575445                | -1.899446 | 3.283143  |
| 12            | 6             | 0           | 4.127315                | -0.617276 | -0.953044 |
| 13            | 6             | 0           | 3.735282                | -1.784416 | -1.878100 |
| 14            | 6             | 0           | 4.749780                | 0.489525  | -1.811956 |
| 15            | 6             | 0           | 5.184354                | -1.095568 | 0.057808  |
| 16            | 6             | 0           | 0.887432                | 3.078141  | 0.281260  |
| 17            | 6             | 0           | 0.349614                | 3.546574  | -1.082573 |
| 18            | 6             | 0           | 2.204408                | 3.843902  | 0.553963  |
| 19            | 6             | 0           | -0.065973               | 3.519265  | 1.409691  |
| 20            | 1             | 0           | 2.587393                | -2.006319 | 0.772655  |
| 21            | 1             | 0           | 2.995435                | 1.903400  | -0.787245 |
| 22            | 1             | 0           | -0.732170               | -0.422135 | 3.432846  |
| 23            | 1             | 0           | -1.702191               | -1.455153 | 2.375616  |
| 24            | 1             | 0           | -0.940493               | -2.135878 | 3.801704  |
| 25            | 1             | 0           | -0.453375               | -3.110542 | 0.735298  |
| 26            | 1             | 0           | -0.098217               | -3.876716 | 2.291197  |
| 27            | 1             | 0           | 1.205105                | -3.555721 | 1.147860  |
| 28            | 1             | 0           | 1.276715                | -2.632678 | 4.039465  |
| 29            | 1             | 0           | 2.532014                | -2.223179 | 2.867343  |
| 30            | 1             | 0           | 1.734720                | -0.940622 | 3.786587  |
| 31            | 1             | 0           | 3.343407                | -2.635170 | -1.313523 |
| 32            | 1             | 0           | 2.963642                | -1.475046 | -2.590394 |
| 33            | 1             | 0           | 4.606307                | -2.130486 | -2.444701 |
| 34            | 1             | 0           | 4.045484                | 0.868641  | -2.559158 |
| 35            | 1             | 0           | 5.619020                | 0.093996  | -2.346114 |

|    |    |   |           |           |           |
|----|----|---|-----------|-----------|-----------|
| 36 | 1  | 0 | 5.094356  | 1.333013  | -1.205201 |
| 37 | 1  | 0 | 6.078973  | -1.444658 | -0.468830 |
| 38 | 1  | 0 | 5.480921  | -0.283250 | 0.728871  |
| 39 | 1  | 0 | 4.818683  | -1.922451 | 0.673184  |
| 40 | 1  | 0 | 2.695934  | 3.485682  | 1.463617  |
| 41 | 1  | 0 | 2.919392  | 3.779335  | -0.268828 |
| 42 | 1  | 0 | 1.976330  | 4.905293  | 0.688615  |
| 43 | 1  | 0 | 1.034988  | 3.267082  | -1.889183 |
| 44 | 1  | 0 | 0.250353  | 4.637650  | -1.088999 |
| 45 | 1  | 0 | -0.628504 | 3.114824  | -1.301730 |
| 46 | 1  | 0 | -0.042641 | 4.610423  | 1.490249  |
| 47 | 1  | 0 | -1.108588 | 3.251417  | 1.238120  |
| 48 | 1  | 0 | 0.241639  | 3.105739  | 2.374988  |
| 49 | 6  | 0 | -1.991744 | -0.612824 | -0.464350 |
| 50 | 17 | 0 | -2.731306 | 0.964467  | 2.017434  |
| 51 | 9  | 0 | -2.192402 | -1.723007 | 0.270649  |
| 52 | 35 | 0 | -0.712805 | -1.039482 | -1.874695 |
| 53 | 35 | 0 | -3.708213 | -0.163744 | -1.277049 |

---

Rotational constants (GHZ):      0.1985526      0.1170838      0.1112105

## Int-2

# opt rcam-b3lyp/6-31g(d)

Stoichiometry C19H29Br2ClFP  
Framework group C1[X(C19H29Br2ClFP)]  
Deg. of freedom 153  
Full point group C1 NOp 1  
Largest Abelian subgroup C1 NOp 1  
Largest concise Abelian subgroup C1 NOp 1

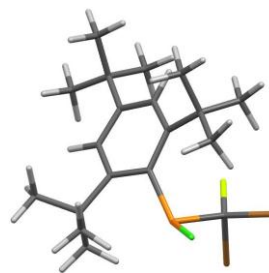

E(RCAM-B3LYP) = -6785.96887086 A.U.  
Dipole moment (field-independent basis, Debye):  
X= 3.8969 Y= -0.4292 Z= -0.2956 Tot= 3.9316

Standard orientation:

| Center Number | Atomic Number | Atomic Type | Coordinates (Angstroms) |           |           |
|---------------|---------------|-------------|-------------------------|-----------|-----------|
|               |               |             | X                       | Y         | Z         |
| 1             | 15            | 0           | -1.081790               | 0.983744  | 0.675976  |
| 2             | 6             | 0           | 0.593352                | 0.232196  | 0.840998  |
| 3             | 6             | 0           | 1.011723                | -1.126508 | 0.698067  |
| 4             | 6             | 0           | 2.207555                | -1.362818 | 0.026359  |
| 5             | 6             | 0           | 3.057530                | -0.360273 | -0.424530 |
| 6             | 6             | 0           | 2.740186                | 0.936938  | -0.053583 |
| 7             | 6             | 0           | 1.553744                | 1.270995  | 0.601133  |
| 8             | 6             | 0           | 0.369506                | -2.405863 | 1.297539  |
| 9             | 6             | 0           | -0.810779               | -2.162924 | 2.236654  |
| 10            | 6             | 0           | -0.073877               | -3.382829 | 0.193471  |
| 11            | 6             | 0           | 1.452175                | -3.090707 | 2.167518  |
| 12            | 6             | 0           | 4.312038                | -0.717912 | -1.226031 |
| 13            | 6             | 0           | 3.895191                | -1.483356 | -2.494978 |
| 14            | 6             | 0           | 5.104002                | 0.523400  | -1.654032 |
| 15            | 6             | 0           | 5.233856                | -1.606766 | -0.371709 |
| 16            | 6             | 0           | 1.428502                | 2.757509  | 1.063646  |
| 17            | 6             | 0           | 0.854060                | 3.661418  | -0.044191 |
| 18            | 6             | 0           | 2.832256                | 3.310998  | 1.408645  |
| 19            | 6             | 0           | 0.620349                | 2.907833  | 2.368117  |
| 20            | 1             | 0           | 2.494202                | -2.391654 | -0.150173 |
| 21            | 1             | 0           | 3.437681                | 1.724985  | -0.287599 |
| 22            | 1             | 0           | -0.579135               | -1.413550 | 2.997046  |
| 23            | 1             | 0           | -1.711261               | -1.862170 | 1.709559  |
| 24            | 1             | 0           | -1.049424               | -3.098492 | 2.752876  |
| 25            | 1             | 0           | -0.894131               | -2.970042 | -0.395442 |
| 26            | 1             | 0           | -0.423971               | -4.315937 | 0.647816  |
| 27            | 1             | 0           | 0.742850                | -3.632628 | -0.489777 |
| 28            | 1             | 0           | 1.021685                | -3.974879 | 2.648365  |
| 29            | 1             | 0           | 2.322346                | -3.421023 | 1.596590  |
| 30            | 1             | 0           | 1.803468                | -2.416149 | 2.954787  |
| 31            | 1             | 0           | 3.355191                | -2.404359 | -2.257853 |
| 32            | 1             | 0           | 3.246750                | -0.869613 | -3.127984 |
| 33            | 1             | 0           | 4.780658                | -1.757045 | -3.078482 |
| 34            | 1             | 0           | 4.498838                | 1.200923  | -2.264626 |
| 35            | 1             | 0           | 5.967141                | 0.218667  | -2.253608 |
| 36            | 1             | 0           | 5.484730                | 1.082916  | -0.793595 |
| 37            | 1             | 0           | 6.134428                | -1.869869 | -0.936800 |
| 38            | 1             | 0           | 5.544717                | -1.086963 | 0.540067  |

|    |    |   |           |           |           |
|----|----|---|-----------|-----------|-----------|
| 39 | 1  | 0 | 4.743796  | -2.538616 | -0.075616 |
| 40 | 1  | 0 | 3.371640  | 2.652279  | 2.096000  |
| 41 | 1  | 0 | 3.457514  | 3.477081  | 0.528363  |
| 42 | 1  | 0 | 2.716399  | 4.283686  | 1.895175  |
| 43 | 1  | 0 | 1.461632  | 3.587610  | -0.952130 |
| 44 | 1  | 0 | 0.870674  | 4.706153  | 0.285646  |
| 45 | 1  | 0 | -0.173670 | 3.402757  | -0.301943 |
| 46 | 1  | 0 | 0.729672  | 3.930467  | 2.742239  |
| 47 | 1  | 0 | -0.449431 | 2.739916  | 2.250290  |
| 48 | 1  | 0 | 0.990934  | 2.226409  | 3.140351  |
| 49 | 6  | 0 | -1.863372 | -0.058152 | -0.756807 |
| 50 | 17 | 0 | -2.400849 | 0.615084  | 2.259296  |
| 51 | 9  | 0 | -0.903243 | -0.710932 | -1.441013 |
| 52 | 35 | 0 | -2.594914 | 1.292514  | -1.981745 |
| 53 | 35 | 0 | -3.286041 | -1.323489 | -0.368422 |

---

Rotational constants (GHZ):      0.1937023      0.1118497      0.1005631



### Int-3

# opt rcam-b3lyp/6-31g(d)

Stoichiometry C19H29Br2ClFP  
Framework group C1[X(C19H29Br2ClFP)]  
Deg. of freedom 153  
Full point group C1 NOP 1  
Largest Abelian subgroup C1 NOP 1  
Largest concise Abelian subgroup C1 NOP 1

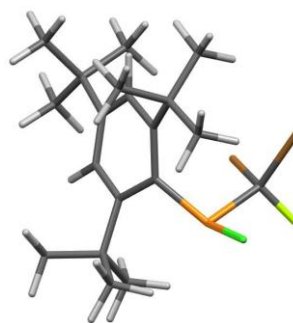

E(RCAM-B3LYP) = -6785.97091341 A.U.  
Dipole moment (field-independent basis, Debye):  
X= 4.3292 Y= -0.8563 Z= 0.8716 Tot= 4.4983

Standard orientation:

| Center Number | Atomic Number | Atomic Type | Coordinates (Angstroms) |           |           |
|---------------|---------------|-------------|-------------------------|-----------|-----------|
|               |               |             | X                       | Y         | Z         |
| 1             | 15            | 0           | -1.320260               | 1.437256  | 0.089356  |
| 2             | 6             | 0           | 0.156857                | 0.676501  | 0.864777  |
| 3             | 6             | 0           | 0.409506                | -0.668470 | 1.284582  |
| 4             | 6             | 0           | 1.595370                | -1.251398 | 0.857334  |
| 5             | 6             | 0           | 2.568814                | -0.578552 | 0.120132  |
| 6             | 6             | 0           | 2.420542                | 0.793268  | 0.002070  |
| 7             | 6             | 0           | 1.261506                | 1.460791  | 0.405109  |
| 8             | 6             | 0           | -0.362155               | -1.481289 | 2.353938  |
| 9             | 6             | 0           | -1.691967               | -0.880688 | 2.803464  |
| 10            | 6             | 0           | -0.606547               | -2.939343 | 1.924010  |
| 11            | 6             | 0           | 0.556521                | -1.483929 | 3.599546  |
| 12            | 6             | 0           | 3.756128                | -1.346403 | -0.463273 |
| 13            | 6             | 0           | 3.207794                | -2.418672 | -1.423412 |
| 14            | 6             | 0           | 4.707709                | -0.436293 | -1.248440 |
| 15            | 6             | 0           | 4.556208                | -2.024130 | 0.662885  |
| 16            | 6             | 0           | 1.316889                | 3.018713  | 0.376028  |
| 17            | 6             | 0           | 1.112075                | 3.584658  | -1.040150 |
| 18            | 6             | 0           | 2.720911                | 3.458699  | 0.857562  |
| 19            | 6             | 0           | 0.336602                | 3.682638  | 1.363692  |
| 20            | 1             | 0           | 1.776734                | -2.286157 | 1.119425  |
| 21            | 1             | 0           | 3.221295                | 1.370875  | -0.434690 |
| 22            | 1             | 0           | -1.582957               | 0.161380  | 3.111154  |
| 23            | 1             | 0           | -2.454486               | -0.937744 | 2.029988  |
| 24            | 1             | 0           | -2.058789               | -1.443768 | 3.667842  |
| 25            | 1             | 0           | -1.166679               | -2.983921 | 0.989553  |
| 26            | 1             | 0           | -1.188042               | -3.452519 | 2.696738  |
| 27            | 1             | 0           | 0.320323                | -3.503854 | 1.793708  |
| 28            | 1             | 0           | 0.076358                | -2.043328 | 4.409685  |
| 29            | 1             | 0           | 1.525634                | -1.946624 | 3.396107  |
| 30            | 1             | 0           | 0.737643                | -0.463874 | 3.953073  |
| 31            | 1             | 0           | 2.580043                | -3.146117 | -0.901166 |
| 32            | 1             | 0           | 2.597924                | -1.962330 | -2.209658 |
| 33            | 1             | 0           | 4.031238                | -2.963219 | -1.897397 |
| 34            | 1             | 0           | 4.196425                | 0.071256  | -2.072413 |
| 35            | 1             | 0           | 5.516584                | -1.034910 | -1.678273 |
| 36            | 1             | 0           | 5.167033                | 0.323970  | -0.608601 |
| 37            | 1             | 0           | 5.400765                | -2.580524 | 0.242614  |
| 38            | 1             | 0           | 4.953520                | -1.282457 | 1.363098  |

|    |    |   |           |           |           |
|----|----|---|-----------|-----------|-----------|
| 39 | 1  | 0 | 3.945937  | -2.730641 | 1.232402  |
| 40 | 1  | 0 | 2.976108  | 3.004164  | 1.819632  |
| 41 | 1  | 0 | 3.514100  | 3.220122  | 0.146066  |
| 42 | 1  | 0 | 2.728043  | 4.545268  | 0.984364  |
| 43 | 1  | 0 | 1.810382  | 3.128392  | -1.749039 |
| 44 | 1  | 0 | 1.292931  | 4.665167  | -1.038148 |
| 45 | 1  | 0 | 0.097770  | 3.409848  | -1.402780 |
| 46 | 1  | 0 | 0.581291  | 4.746154  | 1.447105  |
| 47 | 1  | 0 | -0.706671 | 3.631405  | 1.051216  |
| 48 | 1  | 0 | 0.420546  | 3.240547  | 2.361278  |
| 49 | 6  | 0 | -1.892545 | 0.137066  | -1.171643 |
| 50 | 17 | 0 | -3.061700 | 1.551964  | 1.242920  |
| 51 | 9  | 0 | -2.769674 | 0.796115  | -1.963118 |
| 52 | 35 | 0 | -2.804480 | -1.490486 | -0.624232 |
| 53 | 35 | 0 | -0.347305 | -0.329024 | -2.272741 |

---

Rotational constants (GHZ):      0.1864300      0.1327813      0.1225082

#### 4 Cs-form

# opt cam-b3lyp/6-31g(d)

Stoichiometry C31H39FP2  
 Framework group C1[X(C31H39FP2)]  
 Deg. of freedom 213  
 Full point group C1 NOp 1  
 Largest Abelian subgroup C1 NOp 1  
 Largest concise Abelian subgroup C1 NOp 1

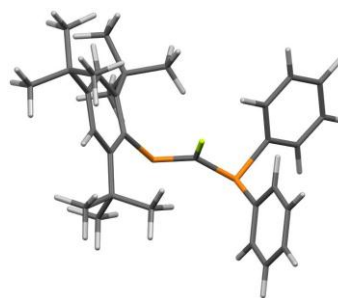

E(RCAM-B3LYP) = -1986.51537440 A.U.  
 Dipole moment (field-independent basis, Debye):  
 X= 0.4458 Y= 0.1100 Z= 1.6858 Tot= 1.7472

Standard orientation:

| Center Number | Atomic Number | Atomic Type | Coordinates (Angstroms) |           |           |
|---------------|---------------|-------------|-------------------------|-----------|-----------|
|               |               |             | X                       | Y         | Z         |
| 1             | 6             | 0           | 1.549658                | -0.076074 | -0.966680 |
| 2             | 6             | 0           | 2.112131                | 1.178995  | -0.596998 |
| 3             | 6             | 0           | 3.226553                | 1.170885  | 0.238638  |
| 4             | 1             | 0           | 3.646898                | 2.113490  | 0.555349  |
| 5             | 6             | 0           | 3.838208                | 0.008315  | 0.690990  |
| 6             | 6             | 0           | 3.334814                | -1.192953 | 0.220786  |
| 7             | 1             | 0           | 3.830388                | -2.102030 | 0.517328  |
| 8             | 6             | 0           | 2.217043                | -1.279415 | -0.615040 |
| 9             | 6             | 0           | 1.606140                | 2.568862  | -1.080112 |
| 10            | 6             | 0           | 0.324234                | 3.003292  | -0.343070 |
| 11            | 1             | 0           | 0.099568                | 4.048540  | -0.582409 |
| 12            | 1             | 0           | 0.455537                | 2.925371  | 0.740268  |
| 13            | 1             | 0           | -0.547238               | 2.412632  | -0.617475 |
| 14            | 6             | 0           | 1.388237                | 2.585961  | -2.605068 |
| 15            | 1             | 0           | 0.595561                | 1.915074  | -2.941882 |
| 16            | 1             | 0           | 2.307253                | 2.308047  | -3.131247 |
| 17            | 1             | 0           | 1.105554                | 3.594026  | -2.925875 |
| 18            | 6             | 0           | 2.646021                | 3.676374  | -0.811129 |
| 19            | 1             | 0           | 3.624857                | 3.437886  | -1.238391 |
| 20            | 1             | 0           | 2.772506                | 3.884799  | 0.255147  |
| 21            | 1             | 0           | 2.297253                | 4.603388  | -1.275252 |
| 22            | 6             | 0           | 5.041243                | 0.096439  | 1.637352  |
| 23            | 6             | 0           | 4.624968                | 0.837464  | 2.920759  |
| 24            | 1             | 0           | 3.819032                | 0.304994  | 3.435686  |
| 25            | 1             | 0           | 4.272955                | 1.851123  | 2.709568  |
| 26            | 1             | 0           | 5.475079                | 0.915588  | 3.607400  |
| 27            | 6             | 0           | 6.182109                | 0.868547  | 0.950688  |
| 28            | 1             | 0           | 6.502849                | 0.359873  | 0.035984  |
| 29            | 1             | 0           | 7.046720                | 0.943968  | 1.619267  |
| 30            | 1             | 0           | 5.881276                | 1.884566  | 0.679892  |
| 31            | 6             | 0           | 5.573686                | -1.284685 | 2.037305  |
| 32            | 1             | 0           | 5.931331                | -1.850840 | 1.171481  |
| 33            | 1             | 0           | 4.811478                | -1.882693 | 2.546966  |
| 34            | 1             | 0           | 6.417094                | -1.167800 | 2.725116  |
| 35            | 6             | 0           | 1.818908                | -2.700107 | -1.110210 |
| 36            | 6             | 0           | 0.525018                | -3.198130 | -0.438142 |
| 37            | 1             | 0           | -0.352766               | -2.617884 | -0.718514 |
| 38            | 1             | 0           | 0.620957                | -3.160256 | 0.652071  |

|    |    |   |           |           |           |
|----|----|---|-----------|-----------|-----------|
| 39 | 1  | 0 | 0.335798  | -4.238864 | -0.723340 |
| 40 | 6  | 0 | 2.897579  | -3.750119 | -0.776798 |
| 41 | 1  | 0 | 2.999486  | -3.921890 | 0.298700  |
| 42 | 1  | 0 | 3.877848  | -3.479946 | -1.180959 |
| 43 | 1  | 0 | 2.606069  | -4.704030 | -1.225845 |
| 44 | 6  | 0 | 1.683202  | -2.733533 | -2.645140 |
| 45 | 1  | 0 | 1.477893  | -3.757248 | -2.975433 |
| 46 | 1  | 0 | 2.612581  | -2.404349 | -3.120960 |
| 47 | 1  | 0 | 0.872803  | -2.109551 | -3.024466 |
| 48 | 15 | 0 | -0.077338 | -0.156941 | -1.864075 |
| 49 | 6  | 0 | -1.174984 | -0.009840 | -0.609356 |
| 50 | 9  | 0 | -0.802379 | 0.178070  | 0.681401  |
| 51 | 15 | 0 | -2.976304 | -0.022050 | -0.953274 |
| 52 | 6  | 0 | -3.566073 | -1.442793 | 0.060639  |
| 53 | 6  | 0 | -2.839856 | -2.062519 | 1.082726  |
| 54 | 1  | 0 | -1.855704 | -1.695764 | 1.347794  |
| 55 | 6  | 0 | -3.372225 | -3.150650 | 1.766175  |
| 56 | 1  | 0 | -2.793746 | -3.623255 | 2.554332  |
| 57 | 6  | 0 | -4.637610 | -3.629608 | 1.448130  |
| 58 | 1  | 0 | -5.050825 | -4.477657 | 1.985601  |
| 59 | 6  | 0 | -5.368924 | -3.021770 | 0.433796  |
| 60 | 1  | 0 | -6.355167 | -3.393916 | 0.173652  |
| 61 | 6  | 0 | -4.831756 | -1.944544 | -0.259592 |
| 62 | 1  | 0 | -5.399942 | -1.489724 | -1.066577 |
| 63 | 6  | 0 | -3.491877 | 1.438134  | 0.048698  |
| 64 | 6  | 0 | -3.520015 | 1.456229  | 1.445511  |
| 65 | 1  | 0 | -3.249630 | 0.565659  | 2.002365  |
| 66 | 6  | 0 | -3.902730 | 2.604328  | 2.126621  |
| 67 | 1  | 0 | -3.922389 | 2.605681  | 3.212320  |
| 68 | 6  | 0 | -4.259028 | 3.750589  | 1.422158  |
| 69 | 1  | 0 | -4.558592 | 4.646554  | 1.957507  |
| 70 | 6  | 0 | -4.235827 | 3.743978  | 0.033107  |
| 71 | 1  | 0 | -4.518440 | 4.633123  | -0.522237 |
| 72 | 6  | 0 | -3.858221 | 2.591735  | -0.648476 |
| 73 | 1  | 0 | -3.849914 | 2.585231  | -1.734891 |

---

Rotational constants (GHZ):            0.1516246            0.0783193            0.0636570

#### 4 C<sub>1</sub> form

# opt cam-b3lyp/6-31g(d)

Stoichiometry C31H39FP2  
 Framework group C1[X(C31H39FP2)]  
 Deg. of freedom 213  
 Full point group C1 NOp 1  
 Largest Abelian subgroup C1 NOp 1  
 Largest concise Abelian subgroup C1 NOp 1

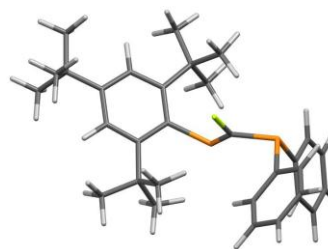

E(RCAM-B3LYP) = -1986.51138995 A.U.  
 Dipole moment (field-independent basis, Debye):  
 X= -0.5700 Y= -0.6974 Z= 1.0609 Tot= 1.3917

Standard orientation:

| Center Number | Atomic Number | Atomic Type | Coordinates (Angstroms) |           |           |
|---------------|---------------|-------------|-------------------------|-----------|-----------|
|               |               |             | X                       | Y         | Z         |
| 1             | 6             | 0           | 1.440725                | 0.304314  | 0.416741  |
| 2             | 6             | 0           | 2.012820                | -0.915722 | 0.882729  |
| 3             | 6             | 0           | 3.352239                | -1.167266 | 0.595669  |
| 4             | 1             | 0           | 3.792446                | -2.093917 | 0.931066  |
| 5             | 6             | 0           | 4.163164                | -0.287495 | -0.108140 |
| 6             | 6             | 0           | 3.598459                | 0.915615  | -0.493976 |
| 7             | 1             | 0           | 4.223765                | 1.620231  | -1.014734 |
| 8             | 6             | 0           | 2.266682                | 1.259923  | -0.238347 |
| 9             | 6             | 0           | 1.255221                | -2.018576 | 1.673307  |
| 10            | 6             | 0           | 0.324876                | -2.795672 | 0.723369  |
| 11            | 1             | 0           | -0.262674               | -3.531439 | 1.285156  |
| 12            | 1             | 0           | 0.916938                | -3.337052 | -0.021620 |
| 13            | 1             | 0           | -0.361799               | -2.152571 | 0.178278  |
| 14            | 6             | 0           | 0.484150                | -1.447668 | 2.879372  |
| 15            | 1             | 0           | -0.330100               | -0.774701 | 2.609628  |
| 16            | 1             | 0           | 1.161020                | -0.898977 | 3.542606  |
| 17            | 1             | 0           | 0.042370                | -2.268716 | 3.454009  |
| 18            | 6             | 0           | 2.210378                | -3.064641 | 2.283707  |
| 19            | 1             | 0           | 2.956080                | -2.608239 | 2.942177  |
| 20            | 1             | 0           | 2.730738                | -3.656372 | 1.525876  |
| 21            | 1             | 0           | 1.623063                | -3.765964 | 2.883974  |
| 22            | 6             | 0           | 5.621040                | -0.659039 | -0.402920 |
| 23            | 6             | 0           | 5.660259                | -1.961768 | -1.221899 |
| 24            | 1             | 0           | 5.134769                | -1.840329 | -2.174402 |
| 25            | 1             | 0           | 5.193109                | -2.793544 | -0.687111 |
| 26            | 1             | 0           | 6.696423                | -2.244343 | -1.438040 |
| 27            | 6             | 0           | 6.375367                | -0.867700 | 0.922564  |
| 28            | 1             | 0           | 6.370706                | 0.047486  | 1.523234  |
| 29            | 1             | 0           | 7.418160                | -1.141875 | 0.728299  |
| 30            | 1             | 0           | 5.927969                | -1.664060 | 1.524104  |
| 31            | 6             | 0           | 6.352227                | 0.426384  | -1.201896 |
| 32            | 1             | 0           | 6.397529                | 1.374378  | -0.656487 |
| 33            | 1             | 0           | 5.874860                | 0.610121  | -2.169645 |
| 34            | 1             | 0           | 7.381592                | 0.108773  | -1.395904 |
| 35            | 6             | 0           | 1.824811                | 2.683232  | -0.695938 |
| 36            | 6             | 0           | 0.865292                | 2.620038  | -1.901109 |
| 37            | 1             | 0           | -0.106706               | 2.200849  | -1.651013 |
| 38            | 1             | 0           | 1.295862                | 2.014547  | -2.704562 |

|    |    |   |           |           |           |
|----|----|---|-----------|-----------|-----------|
| 39 | 1  | 0 | 0.698337  | 3.630063  | -2.291728 |
| 40 | 6  | 0 | 3.020759  | 3.536968  | -1.167067 |
| 41 | 1  | 0 | 3.482318  | 3.148099  | -2.079400 |
| 42 | 1  | 0 | 3.793234  | 3.632176  | -0.398023 |
| 43 | 1  | 0 | 2.659209  | 4.543336  | -1.397075 |
| 44 | 6  | 0 | 1.200253  | 3.483845  | 0.463901  |
| 45 | 1  | 0 | 0.971497  | 4.500500  | 0.126616  |
| 46 | 1  | 0 | 1.901514  | 3.556481  | 1.301680  |
| 47 | 1  | 0 | 0.271055  | 3.056457  | 0.843364  |
| 48 | 15 | 0 | -0.356981 | 0.701436  | 0.719051  |
| 49 | 6  | 0 | -1.101336 | 0.130534  | -0.669644 |
| 50 | 9  | 0 | -0.425612 | -0.534579 | -1.638574 |
| 51 | 15 | 0 | -2.809064 | 0.448544  | -1.259010 |
| 52 | 6  | 0 | -3.571834 | -1.221336 | -1.166598 |
| 53 | 6  | 0 | -3.287226 | -2.163241 | -0.173608 |
| 54 | 1  | 0 | -2.572511 | -1.922801 | 0.606501  |
| 55 | 6  | 0 | -3.907247 | -3.406576 | -0.179926 |
| 56 | 1  | 0 | -3.673330 | -4.129959 | 0.595300  |
| 57 | 6  | 0 | -4.822804 | -3.724661 | -1.178212 |
| 58 | 1  | 0 | -5.305365 | -4.697265 | -1.183384 |
| 59 | 6  | 0 | -5.112793 | -2.797696 | -2.171998 |
| 60 | 1  | 0 | -5.821780 | -3.042990 | -2.956691 |
| 61 | 6  | 0 | -4.486064 | -1.556392 | -2.168257 |
| 62 | 1  | 0 | -4.702502 | -0.839980 | -2.955491 |
| 63 | 6  | 0 | -3.539511 | 1.381371  | 0.148848  |
| 64 | 6  | 0 | -4.237550 | 0.806084  | 1.211753  |
| 65 | 1  | 0 | -4.364760 | -0.269619 | 1.259220  |
| 66 | 6  | 0 | -4.783685 | 1.603804  | 2.211233  |
| 67 | 1  | 0 | -5.325867 | 1.141913  | 3.030802  |
| 68 | 6  | 0 | -4.636776 | 2.984876  | 2.164183  |
| 69 | 1  | 0 | -5.063071 | 3.605119  | 2.946736  |
| 70 | 6  | 0 | -3.950921 | 3.570368  | 1.105404  |
| 71 | 1  | 0 | -3.840437 | 4.649248  | 1.056158  |
| 72 | 6  | 0 | -3.417926 | 2.774437  | 0.100468  |
| 73 | 1  | 0 | -2.900758 | 3.238390  | -0.735204 |

---

Rotational constants (GHZ):      0.1679285      0.0725725      0.0616961

## 5 Cs form

# opt cam-b3lyp/6-31g(d)

Stoichiometry C31H39CIP2  
 Framework group C1[X(C31H39CIP2)]  
 Deg. of freedom 213  
 Full point group C1 NOP 1  
 Largest Abelian subgroup C1 NOP 1  
 Largest concise Abelian subgroup C1 NOP 1

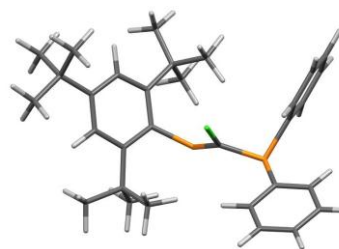

E(RCAM-B3LYP) = -2346.89910352 A.U.  
 Dipole moment (field-independent basis, Debye):  
 X= 0.8959 Y= 0.6924 Z= -1.1888 Tot= 1.6417

Standard orientation:

| Center Number | Atomic Number | Atomic Type | Coordinates (Angstroms) |           |           |
|---------------|---------------|-------------|-------------------------|-----------|-----------|
|               |               |             | X                       | Y         | Z         |
| 1             | 17            | 0           | -0.733611               | -0.329164 | -1.279989 |
| 2             | 15            | 0           | -0.048982               | -0.150275 | 1.688500  |
| 3             | 15            | 0           | -2.905684               | -0.175923 | 0.954395  |
| 4             | 6             | 0           | -1.143868               | -0.257815 | 0.420334  |
| 5             | 6             | 0           | 1.624184                | -0.057974 | 0.892451  |
| 6             | 6             | 0           | 2.147690                | 1.200223  | 0.475031  |
| 7             | 6             | 0           | 3.300076                | 1.194959  | -0.306640 |
| 8             | 6             | 0           | 3.985092                | 0.037456  | -0.656441 |
| 9             | 6             | 0           | 3.523707                | -1.154175 | -0.122250 |
| 10            | 6             | 0           | 2.374369                | -1.242533 | 0.668583  |
| 11            | 6             | 0           | 1.562778                | 2.589015  | 0.863577  |
| 12            | 6             | 0           | 0.293313                | 2.928491  | 0.060804  |
| 13            | 6             | 0           | 1.281955                | 2.667984  | 2.376474  |
| 14            | 6             | 0           | 2.564209                | 3.726719  | 0.578918  |
| 15            | 6             | 0           | 5.221283                | 0.125256  | -1.558815 |
| 16            | 6             | 0           | 6.292256                | 1.000709  | -0.883465 |
| 17            | 6             | 0           | 4.822398                | 0.755344  | -2.905359 |
| 18            | 6             | 0           | 5.838575                | -1.249668 | -1.841219 |
| 19            | 6             | 0           | 2.039982                | -2.634906 | 1.275477  |
| 20            | 6             | 0           | 1.826833                | -2.529640 | 2.798155  |
| 21            | 6             | 0           | 0.812125                | -3.275412 | 0.603543  |
| 22            | 6             | 0           | 3.196612                | -3.636981 | 1.091713  |
| 23            | 6             | 0           | -3.744744               | -1.448157 | -0.073915 |
| 24            | 6             | 0           | -3.117762               | -2.652394 | -0.401606 |
| 25            | 6             | 0           | -3.813558               | -3.660037 | -1.059100 |
| 26            | 6             | 0           | -5.151010               | -3.485235 | -1.393489 |
| 27            | 6             | 0           | -5.789631               | -2.295702 | -1.061843 |
| 28            | 6             | 0           | -5.094098               | -1.287942 | -0.405388 |
| 29            | 6             | 0           | -3.448612               | 1.404665  | 0.177318  |
| 30            | 6             | 0           | -3.640580               | 2.492650  | 1.032661  |
| 31            | 6             | 0           | -4.013561               | 3.735372  | 0.531382  |
| 32            | 6             | 0           | -4.205899               | 3.901499  | -0.834443 |
| 33            | 6             | 0           | -4.025624               | 2.823256  | -1.695924 |
| 34            | 6             | 0           | -3.649128               | 1.583604  | -1.195425 |
| 35            | 1             | 0           | 3.692646                | 2.136018  | -0.661543 |
| 36            | 1             | 0           | 4.079930                | -2.053466 | -0.328035 |
| 37            | 1             | 0           | 0.486232                | 2.856412  | -1.013700 |
| 38            | 1             | 0           | -0.547128               | 2.277167  | 0.293949  |

|    |   |   |           |           |           |
|----|---|---|-----------|-----------|-----------|
| 39 | 1 | 0 | -0.018166 | 3.955575  | 0.280853  |
| 40 | 1 | 0 | 0.498912  | 1.984839  | 2.712693  |
| 41 | 1 | 0 | 0.950651  | 3.678526  | 2.637194  |
| 42 | 1 | 0 | 2.186625  | 2.447907  | 2.952400  |
| 43 | 1 | 0 | 2.154425  | 4.660382  | 0.975017  |
| 44 | 1 | 0 | 3.532057  | 3.556608  | 1.060474  |
| 45 | 1 | 0 | 2.729859  | 3.882598  | -0.490914 |
| 46 | 1 | 0 | 6.596550  | 0.574150  | 0.077691  |
| 47 | 1 | 0 | 5.931867  | 2.016731  | -0.698998 |
| 48 | 1 | 0 | 7.180833  | 1.073101  | -1.520161 |
| 49 | 1 | 0 | 4.411080  | 1.760688  | -2.778426 |
| 50 | 1 | 0 | 5.695739  | 0.832343  | -3.562300 |
| 51 | 1 | 0 | 4.066841  | 0.147446  | -3.412956 |
| 52 | 1 | 0 | 6.701841  | -1.134770 | -2.504226 |
| 53 | 1 | 0 | 5.128633  | -1.920426 | -2.335395 |
| 54 | 1 | 0 | 6.189807  | -1.735992 | -0.925585 |
| 55 | 1 | 0 | 2.709405  | -2.100376 | 3.282925  |
| 56 | 1 | 0 | 0.964200  | -1.920751 | 3.076321  |
| 57 | 1 | 0 | 1.659908  | -3.527008 | 3.218343  |
| 58 | 1 | 0 | -0.104323 | -2.721310 | 0.801394  |
| 59 | 1 | 0 | 0.671592  | -4.294080 | 0.981456  |
| 60 | 1 | 0 | 0.948268  | -3.329196 | -0.480940 |
| 61 | 1 | 0 | 2.944855  | -4.561692 | 1.619242  |
| 62 | 1 | 0 | 3.359731  | -3.901810 | 0.043009  |
| 63 | 1 | 0 | 4.137432  | -3.263979 | 1.507357  |
| 64 | 1 | 0 | -2.073856 | -2.807241 | -0.150951 |
| 65 | 1 | 0 | -3.304592 | -4.585054 | -1.312703 |
| 66 | 1 | 0 | -5.693668 | -4.272407 | -1.907785 |
| 67 | 1 | 0 | -6.835199 | -2.148809 | -1.315469 |
| 68 | 1 | 0 | -5.606971 | -0.364083 | -0.155667 |
| 69 | 1 | 0 | -3.497466 | 2.362254  | 2.101648  |
| 70 | 1 | 0 | -4.159730 | 4.570578  | 1.209508  |
| 71 | 1 | 0 | -4.500704 | 4.869173  | -1.229170 |
| 72 | 1 | 0 | -4.177457 | 2.949269  | -2.763680 |
| 73 | 1 | 0 | -3.515451 | 0.747680  | -1.873082 |

---

Rotational constants (GHZ):      0.1541561      0.0743039      0.0604939



## 5 C<sub>1</sub> form

# opt cam-b3lyp/6-31g(d)

Stoichiometry C31H39CIP2  
 Framework group C1[X(C31H39CIP2)]  
 Deg. of freedom 213  
 Full point group C1 NOp 1  
 Largest Abelian subgroup C1 NOp 1  
 Largest concise Abelian subgroup C1 NOp 1

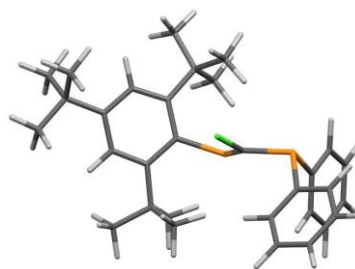

E(RCAM-B3LYP) = -2346.89757714 A.U.  
 Dipole moment (field-independent basis, Debye):  
 X= -0.1705 Y= -0.3370 Z= 1.5388 Tot= 1.5845

Standard orientation:

| Center Number | Atomic Number | Atomic Type | Coordinates (Angstroms) |           |           |
|---------------|---------------|-------------|-------------------------|-----------|-----------|
|               |               |             | X                       | Y         | Z         |
| 1             | 17            | 0           | -0.221097               | -0.970762 | -1.800738 |
| 2             | 15            | 0           | -0.329241               | 0.860030  | 0.637396  |
| 3             | 15            | 0           | -2.764163               | 0.437635  | -1.226856 |
| 4             | 6             | 0           | -1.051148               | 0.071031  | -0.660644 |
| 5             | 6             | 0           | 1.474808                | 0.446605  | 0.481466  |
| 6             | 6             | 0           | 2.308953                | 1.219666  | -0.378158 |
| 7             | 6             | 0           | 3.587837                | 0.737116  | -0.645359 |
| 8             | 6             | 0           | 4.105132                | -0.421306 | -0.077678 |
| 9             | 6             | 0           | 3.320644                | -1.065771 | 0.864444  |
| 10            | 6             | 0           | 2.024125                | -0.654837 | 1.187838  |
| 11            | 6             | 0           | 1.929363                | 2.595791  | -1.000023 |
| 12            | 6             | 0           | 0.965728                | 2.456110  | -2.193516 |
| 13            | 6             | 0           | 1.334650                | 3.536977  | 0.065692  |
| 14            | 6             | 0           | 3.170374                | 3.334406  | -1.541482 |
| 15            | 6             | 0           | 5.506654                | -0.904480 | -0.467480 |
| 16            | 6             | 0           | 6.543629                | 0.177904  | -0.117364 |
| 17            | 6             | 0           | 5.545150                | -1.176330 | -1.982051 |
| 18            | 6             | 0           | 5.902482                | -2.196019 | 0.257882  |
| 19            | 6             | 0           | 1.307882                | -1.415893 | 2.338983  |
| 20            | 6             | 0           | 0.796631                | -0.427131 | 3.405034  |
| 21            | 6             | 0           | 0.152546                | -2.291935 | 1.823005  |
| 22            | 6             | 0           | 2.263167                | -2.368005 | 3.084526  |
| 23            | 6             | 0           | -3.485816               | 1.307595  | 0.226487  |
| 24            | 6             | 0           | -3.599989               | 2.697646  | 0.143370  |
| 25            | 6             | 0           | -4.140865               | 3.429940  | 1.193802  |
| 26            | 6             | 0           | -4.589403               | 2.776427  | 2.335231  |
| 27            | 6             | 0           | -4.495142               | 1.391007  | 2.422745  |
| 28            | 6             | 0           | -3.946505               | 0.661173  | 1.376196  |
| 29            | 6             | 0           | -3.603363               | -1.197894 | -1.190875 |
| 30            | 6             | 0           | -4.749602               | -1.323089 | -1.981043 |
| 31            | 6             | 0           | -5.471119               | -2.510427 | -2.005143 |
| 32            | 6             | 0           | -5.043503               | -3.598460 | -1.252966 |
| 33            | 6             | 0           | -3.894994               | -3.491926 | -0.476453 |
| 34            | 6             | 0           | -3.181292               | -2.299519 | -0.443110 |
| 35            | 1             | 0           | 4.220357                | 1.287673  | -1.325643 |
| 36            | 1             | 0           | 3.732063                | -1.924643 | 1.368149  |
| 37            | 1             | 0           | 1.373204                | 1.768890  | -2.940937 |
| 38            | 1             | 0           | -0.018359               | 2.090260  | -1.904716 |

|    |   |   |           |           |           |
|----|---|---|-----------|-----------|-----------|
| 39 | 1 | 0 | 0.828921  | 3.432841  | -2.671053 |
| 40 | 1 | 0 | 0.378922  | 3.193689  | 0.466651  |
| 41 | 1 | 0 | 1.158736  | 4.524997  | -0.372655 |
| 42 | 1 | 0 | 2.026037  | 3.657438  | 0.905980  |
| 43 | 1 | 0 | 2.870700  | 4.339292  | -1.852745 |
| 44 | 1 | 0 | 3.952439  | 3.439751  | -0.783417 |
| 45 | 1 | 0 | 3.600872  | 2.846078  | -2.420495 |
| 46 | 1 | 0 | 6.537716  | 0.392265  | 0.956143  |
| 47 | 1 | 0 | 6.349504  | 1.115340  | -0.646296 |
| 48 | 1 | 0 | 7.550136  | -0.156511 | -0.391926 |
| 49 | 1 | 0 | 5.310532  | -0.279470 | -2.562303 |
| 50 | 1 | 0 | 6.542084  | -1.517358 | -2.282269 |
| 51 | 1 | 0 | 4.822532  | -1.950601 | -2.258431 |
| 52 | 1 | 0 | 6.898445  | -2.510852 | -0.069229 |
| 53 | 1 | 0 | 5.208430  | -3.013769 | 0.039288  |
| 54 | 1 | 0 | 5.940785  | -2.059820 | 1.343395  |
| 55 | 1 | 0 | 1.621174  | 0.176327  | 3.797672  |
| 56 | 1 | 0 | 0.030972  | 0.255243  | 3.030854  |
| 57 | 1 | 0 | 0.353216  | -0.979727 | 4.240345  |
| 58 | 1 | 0 | -0.664981 | -1.696094 | 1.419947  |
| 59 | 1 | 0 | -0.249382 | -2.897341 | 2.643039  |
| 60 | 1 | 0 | 0.499455  | -2.969232 | 1.036454  |
| 61 | 1 | 0 | 1.730841  | -2.800282 | 3.937019  |
| 62 | 1 | 0 | 2.597399  | -3.201394 | 2.459532  |
| 63 | 1 | 0 | 3.144555  | -1.849402 | 3.473313  |
| 64 | 1 | 0 | -3.262571 | 3.208945  | -0.753940 |
| 65 | 1 | 0 | -4.218809 | 4.510056  | 1.116717  |
| 66 | 1 | 0 | -5.019022 | 3.344869  | 3.154553  |
| 67 | 1 | 0 | -4.851807 | 0.876664  | 3.310017  |
| 68 | 1 | 0 | -3.884426 | -0.419664 | 1.449766  |
| 69 | 1 | 0 | -5.076928 | -0.482979 | -2.587490 |
| 70 | 1 | 0 | -6.361760 | -2.588950 | -2.621020 |
| 71 | 1 | 0 | -5.600035 | -4.530391 | -1.277200 |
| 72 | 1 | 0 | -3.551094 | -4.340899 | 0.106629  |
| 73 | 1 | 0 | -2.283221 | -2.231504 | 0.160603  |

---

Rotational constants (GHZ):      0.1617409      0.0693841      0.0632887

## 6 Cs form

# opt cam-b3lyp/6-31g(d)

Stoichiometry C<sub>34</sub>H<sub>48</sub>P<sub>2</sub>Si  
Framework group C1[X(C<sub>34</sub>H<sub>48</sub>P<sub>2</sub>Si)]  
Deg. of freedom 249  
Full point group C1 NOp 1  
Largest Abelian subgroup C1 NOp 1  
Largest concise Abelian subgroup C1 NOp 1

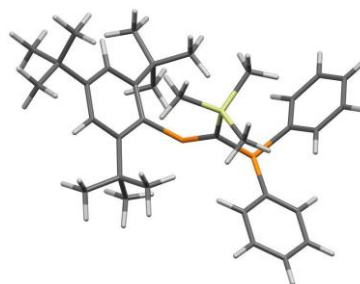

E(RCAM-B3LYP) = -2295.87473709 A.U.  
Dipole moment (field-independent basis, Debye):  
X= 1.1985 Y= -0.2567 Z= 1.7294 Tot= 2.1197

Standard orientation:

| Center Number | Atomic Number | Atomic Type | Coordinates (Angstroms) |           |           |
|---------------|---------------|-------------|-------------------------|-----------|-----------|
|               |               |             | X                       | Y         | Z         |
| 1             | 15            | 0           | -0.000229               | 0.165484  | -1.471002 |
| 2             | 15            | 0           | -2.747790               | -0.072034 | -1.046297 |
| 3             | 14            | 0           | -0.850335               | -0.352683 | 1.675498  |
| 4             | 6             | 0           | -1.081471               | -0.033274 | -0.196045 |
| 5             | 6             | 0           | 1.767837                | 0.162316  | -0.862055 |
| 6             | 6             | 0           | 2.422798                | 1.358085  | -0.462508 |
| 7             | 6             | 0           | 3.679217                | 1.256423  | 0.143359  |
| 8             | 6             | 0           | 4.337671                | 0.052414  | 0.325076  |
| 9             | 6             | 0           | 3.746147                | -1.077010 | -0.230290 |
| 10            | 6             | 0           | 2.502379                | -1.063560 | -0.857103 |
| 11            | 6             | 0           | 1.866283                | 2.795856  | -0.668674 |
| 12            | 6             | 0           | 0.802930                | 3.135282  | 0.388304  |
| 13            | 6             | 0           | 1.293405                | 2.982073  | -2.086302 |
| 14            | 6             | 0           | 2.969493                | 3.865826  | -0.538361 |
| 15            | 6             | 0           | 5.683601                | -0.064814 | 1.048365  |
| 16            | 6             | 0           | 6.165920                | 1.279824  | 1.605562  |
| 17            | 6             | 0           | 5.539130                | -1.045373 | 2.226167  |
| 18            | 6             | 0           | 6.752683                | -0.591179 | 0.074115  |
| 19            | 6             | 0           | 2.055861                | -2.376386 | -1.566823 |
| 20            | 6             | 0           | 3.192214                | -3.416536 | -1.620916 |
| 21            | 6             | 0           | 0.887004                | -3.072046 | -0.848025 |
| 22            | 6             | 0           | 1.693190                | -2.093845 | -3.038354 |
| 23            | 6             | 0           | -3.655405               | -1.449429 | -0.216252 |
| 24            | 6             | 0           | -4.580523               | -1.309438 | 0.821523  |
| 25            | 6             | 0           | -5.221181               | -2.421411 | 1.357538  |
| 26            | 6             | 0           | -4.943808               | -3.693706 | 0.869664  |
| 27            | 6             | 0           | -4.032123               | -3.847077 | -0.169093 |
| 28            | 6             | 0           | -3.404925               | -2.733132 | -0.712785 |
| 29            | 6             | 0           | -3.677916               | 1.423077  | -0.507827 |
| 30            | 6             | 0           | -3.060897               | 2.575518  | -0.021778 |
| 31            | 6             | 0           | -3.793383               | 3.733523  | 0.219643  |
| 32            | 6             | 0           | -5.159617               | 3.763076  | -0.026058 |
| 33            | 6             | 0           | -5.786915               | 2.626756  | -0.527595 |
| 34            | 6             | 0           | -5.052894               | 1.474734  | -0.774564 |
| 35            | 6             | 0           | 0.910677                | -0.101998 | 2.293025  |
| 36            | 6             | 0           | -1.300452               | -2.130439 | 2.120055  |
| 37            | 6             | 0           | -1.954368               | 0.803315  | 2.676715  |
| 38            | 1             | 0           | 4.158888                | 2.156678  | 0.490833  |

|    |   |   |           |           |           |
|----|---|---|-----------|-----------|-----------|
| 39 | 1 | 0 | 4.292361  | -2.006589 | -0.174365 |
| 40 | 1 | 0 | 0.380063  | 4.127922  | 0.195954  |
| 41 | 1 | 0 | -0.010807 | 2.412109  | 0.388764  |
| 42 | 1 | 0 | 1.243234  | 3.146478  | 1.390636  |
| 43 | 1 | 0 | 2.038743  | 2.718918  | -2.843573 |
| 44 | 1 | 0 | 0.399460  | 2.387020  | -2.282928 |
| 45 | 1 | 0 | 1.012491  | 4.029701  | -2.235395 |
| 46 | 1 | 0 | 2.546310  | 4.839609  | -0.802280 |
| 47 | 1 | 0 | 3.809905  | 3.673236  | -1.212229 |
| 48 | 1 | 0 | 3.355555  | 3.955877  | 0.480649  |
| 49 | 1 | 0 | 6.339643  | 2.012713  | 0.811274  |
| 50 | 1 | 0 | 5.449174  | 1.705813  | 2.314815  |
| 51 | 1 | 0 | 7.113081  | 1.139019  | 2.135675  |
| 52 | 1 | 0 | 4.784994  | -0.692955 | 2.937092  |
| 53 | 1 | 0 | 6.491381  | -1.143753 | 2.758902  |
| 54 | 1 | 0 | 5.240701  | -2.042775 | 1.890913  |
| 55 | 1 | 0 | 7.718472  | -0.684126 | 0.582896  |
| 56 | 1 | 0 | 6.491517  | -1.575364 | -0.325277 |
| 57 | 1 | 0 | 6.879043  | 0.090713  | -0.772870 |
| 58 | 1 | 0 | 3.465630  | -3.793207 | -0.630771 |
| 59 | 1 | 0 | 4.091058  | -3.023260 | -2.105069 |
| 60 | 1 | 0 | 2.850682  | -4.275628 | -2.205754 |
| 61 | 1 | 0 | 1.154839  | -3.296460 | 0.189647  |
| 62 | 1 | 0 | 0.658338  | -4.020295 | -1.347148 |
| 63 | 1 | 0 | -0.023972 | -2.475856 | -0.838724 |
| 64 | 1 | 0 | 1.455059  | -3.033994 | -3.547166 |
| 65 | 1 | 0 | 0.828292  | -1.438165 | -3.153647 |
| 66 | 1 | 0 | 2.536530  | -1.630270 | -3.560109 |
| 67 | 1 | 0 | -4.809004 | -0.324642 | 1.214194  |
| 68 | 1 | 0 | -5.937182 | -2.292009 | 2.163811  |
| 69 | 1 | 0 | -5.442829 | -4.560932 | 1.291227  |
| 70 | 1 | 0 | -3.817284 | -4.835147 | -0.564780 |
| 71 | 1 | 0 | -2.710282 | -2.858692 | -1.539222 |
| 72 | 1 | 0 | -1.995482 | 2.574807  | 0.168899  |
| 73 | 1 | 0 | -3.289262 | 4.615647  | 0.603426  |
| 74 | 1 | 0 | -5.731861 | 4.665937  | 0.163562  |
| 75 | 1 | 0 | -6.852855 | 2.638932  | -0.734784 |
| 76 | 1 | 0 | -5.557210 | 0.602155  | -1.180194 |
| 77 | 1 | 0 | 1.286238  | 0.911181  | 2.141241  |
| 78 | 1 | 0 | 1.622628  | -0.790226 | 1.831043  |
| 79 | 1 | 0 | 0.908770  | -0.298383 | 3.372344  |
| 80 | 1 | 0 | -0.781864 | -2.859451 | 1.492460  |
| 81 | 1 | 0 | -0.988293 | -2.308914 | 3.156077  |
| 82 | 1 | 0 | -2.370781 | -2.331811 | 2.053733  |
| 83 | 1 | 0 | -1.876883 | 0.530776  | 3.735734  |
| 84 | 1 | 0 | -3.006980 | 0.738527  | 2.392619  |
| 85 | 1 | 0 | -1.650662 | 1.850270  | 2.584141  |

---

Rotational constants (GHZ):      0.1442370      0.0646449      0.0541063

## 6 C1 form (enantiomeric form)

# opt cam-b3lyp/6-31g(d)

Stoichiometry C34H48P2Si  
Framework group C1[X(C34H48P2Si)]  
Deg. of freedom 249  
Full point group C1 NOp 1  
Largest Abelian subgroup C1 NOp 1  
Largest concise Abelian subgroup C1 NOp 1

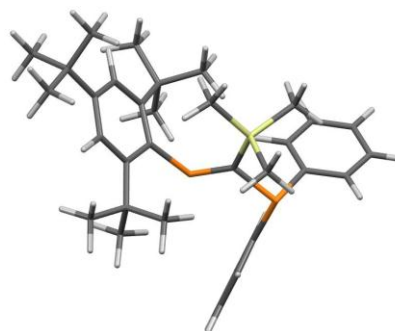

E(RCAM-B3LYP) = -2295.88012381 A.U.  
Dipole moment (field-independent basis, Debye):  
X= 0.9843 Y= -0.8099 Z= -0.8742 Tot= 1.5456

Standard orientation:

| Center Number | Atomic Number | Atomic Type | Coordinates (Angstroms) |           |           |
|---------------|---------------|-------------|-------------------------|-----------|-----------|
|               |               |             | X                       | Y         | Z         |
| 1             | 15            | 0           | -0.396134               | 0.586541  | -0.628390 |
| 2             | 15            | 0           | -2.888393               | 0.384223  | 1.022115  |
| 3             | 14            | 0           | -0.417457               | -0.913609 | 2.318501  |
| 4             | 6             | 0           | -1.090709               | -0.019024 | 0.771656  |
| 5             | 6             | 0           | 1.449205                | 0.301716  | -0.578526 |
| 6             | 6             | 0           | 2.301468                | 1.302243  | -0.032937 |
| 7             | 6             | 0           | 3.653594                | 0.990179  | 0.147267  |
| 8             | 6             | 0           | 4.213428                | -0.216467 | -0.239198 |
| 9             | 6             | 0           | 3.387692                | -1.103998 | -0.918255 |
| 10            | 6             | 0           | 2.029331                | -0.879486 | -1.128793 |
| 11            | 6             | 0           | 1.866452                | 2.751805  | 0.341301  |
| 12            | 6             | 0           | 1.038014                | 2.796853  | 1.637517  |
| 13            | 6             | 0           | 1.089411                | 3.413081  | -0.814766 |
| 14            | 6             | 0           | 3.081961                | 3.669546  | 0.584846  |
| 15            | 6             | 0           | 5.683277                | -0.573657 | 0.008045  |
| 16            | 6             | 0           | 6.426305                | 0.516105  | 0.789949  |
| 17            | 6             | 0           | 5.755235                | -1.878279 | 0.822092  |
| 18            | 6             | 0           | 6.401991                | -0.772424 | -1.338419 |
| 19            | 6             | 0           | 1.268409                | -1.931394 | -1.985975 |
| 20            | 6             | 0           | 2.232499                | -2.887897 | -2.715999 |
| 21            | 6             | 0           | 0.360298                | -2.823113 | -1.120607 |
| 22            | 6             | 0           | 0.456922                | -1.250950 | -3.105245 |
| 23            | 6             | 0           | -3.307447               | 1.675226  | -0.228727 |
| 24            | 6             | 0           | -3.935223               | 1.432396  | -1.450986 |
| 25            | 6             | 0           | -4.265200               | 2.484303  | -2.299743 |
| 26            | 6             | 0           | -3.969450               | 3.793639  | -1.942411 |
| 27            | 6             | 0           | -3.351685               | 4.050492  | -0.722354 |
| 28            | 6             | 0           | -3.036789               | 3.001173  | 0.129942  |
| 29            | 6             | 0           | -3.786795               | -1.099944 | 0.397649  |
| 30            | 6             | 0           | -3.370969               | -1.883831 | -0.681369 |
| 31            | 6             | 0           | -4.116933               | -2.983872 | -1.089133 |
| 32            | 6             | 0           | -5.292589               | -3.316302 | -0.424062 |
| 33            | 6             | 0           | -5.719285               | -2.543981 | 0.649849  |
| 34            | 6             | 0           | -4.968442               | -1.447353 | 1.058587  |
| 35            | 6             | 0           | 1.410020                | -1.350026 | 2.279186  |
| 36            | 6             | 0           | -1.392442               | -2.513776 | 2.543745  |
| 37            | 6             | 0           | -0.715390               | 0.176975  | 3.828525  |
| 38            | 1             | 0           | 4.297031                | 1.722606  | 0.605593  |

|    |   |   |           |           |           |
|----|---|---|-----------|-----------|-----------|
| 39 | 1 | 0 | 3.832098  | -2.012900 | -1.295870 |
| 40 | 1 | 0 | 0.822123  | 3.837855  | 1.903074  |
| 41 | 1 | 0 | 0.088384  | 2.271798  | 1.548045  |
| 42 | 1 | 0 | 1.596689  | 2.349591  | 2.466607  |
| 43 | 1 | 0 | 1.675921  | 3.386351  | -1.738806 |
| 44 | 1 | 0 | 0.124047  | 2.946303  | -1.018033 |
| 45 | 1 | 0 | 0.890804  | 4.462047  | -0.570392 |
| 46 | 1 | 0 | 2.722165  | 4.690750  | 0.740721  |
| 47 | 1 | 0 | 3.765625  | 3.685891  | -0.269283 |
| 48 | 1 | 0 | 3.648829  | 3.393241  | 1.478765  |
| 49 | 1 | 0 | 6.456464  | 1.463609  | 0.242655  |
| 50 | 1 | 0 | 5.967718  | 0.698967  | 1.766926  |
| 51 | 1 | 0 | 7.460951  | 0.203562  | 0.962725  |
| 52 | 1 | 0 | 5.249945  | -1.765118 | 1.786570  |
| 53 | 1 | 0 | 6.798797  | -2.151402 | 1.013254  |
| 54 | 1 | 0 | 5.283711  | -2.712760 | 0.295313  |
| 55 | 1 | 0 | 7.452410  | -1.036796 | -1.174040 |
| 56 | 1 | 0 | 5.946166  | -1.572216 | -1.929023 |
| 57 | 1 | 0 | 6.371689  | 0.143844  | -1.936653 |
| 58 | 1 | 0 | 2.776944  | -3.543376 | -2.030278 |
| 59 | 1 | 0 | 2.958391  | -2.349621 | -3.333017 |
| 60 | 1 | 0 | 1.649731  | -3.535740 | -3.377712 |
| 61 | 1 | 0 | 0.955454  | -3.383084 | -0.391777 |
| 62 | 1 | 0 | -0.161161 | -3.551086 | -1.752718 |
| 63 | 1 | 0 | -0.390632 | -2.255344 | -0.573905 |
| 64 | 1 | 0 | -0.009758 | -2.012858 | -3.738686 |
| 65 | 1 | 0 | -0.342868 | -0.604994 | -2.738069 |
| 66 | 1 | 0 | 1.109955  | -0.640003 | -3.736687 |
| 67 | 1 | 0 | -4.171194 | 0.416238  | -1.746522 |
| 68 | 1 | 0 | -4.753987 | 2.276185  | -3.246936 |
| 69 | 1 | 0 | -4.226480 | 4.612776  | -2.607163 |
| 70 | 1 | 0 | -3.126949 | 5.071471  | -0.428626 |
| 71 | 1 | 0 | -2.574485 | 3.211328  | 1.091072  |
| 72 | 1 | 0 | -2.457975 | -1.630897 | -1.209532 |
| 73 | 1 | 0 | -3.778396 | -3.583660 | -1.928834 |
| 74 | 1 | 0 | -5.872954 | -4.177437 | -0.741249 |
| 75 | 1 | 0 | -6.634873 | -2.798479 | 1.175053  |
| 76 | 1 | 0 | -5.298681 | -0.852680 | 1.905692  |
| 77 | 1 | 0 | 2.052280  | -0.470522 | 2.192491  |
| 78 | 1 | 0 | 1.669607  | -2.026974 | 1.463255  |
| 79 | 1 | 0 | 1.654125  | -1.853297 | 3.222590  |
| 80 | 1 | 0 | -1.298392 | -3.176266 | 1.677846  |
| 81 | 1 | 0 | -1.009314 | -3.051986 | 3.418332  |
| 82 | 1 | 0 | -2.458845 | -2.334145 | 2.705513  |
| 83 | 1 | 0 | -0.385575 | -0.350101 | 4.731291  |
| 84 | 1 | 0 | -1.773604 | 0.422900  | 3.947548  |
| 85 | 1 | 0 | -0.156615 | 1.115746  | 3.772079  |

---

Rotational constants (GHZ):      0.1379850      0.0671368      0.0589772

## 5. NMR Charts

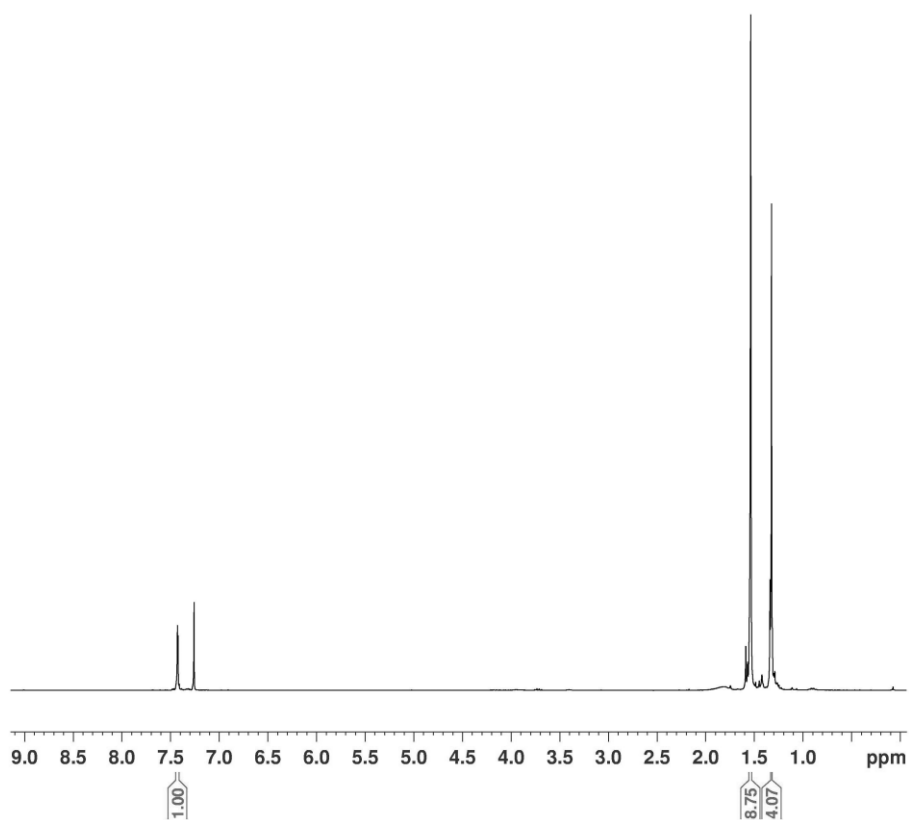

$^1\text{H}$  NMR (300 MHz,  $\text{CDCl}_3$ ) of **1**

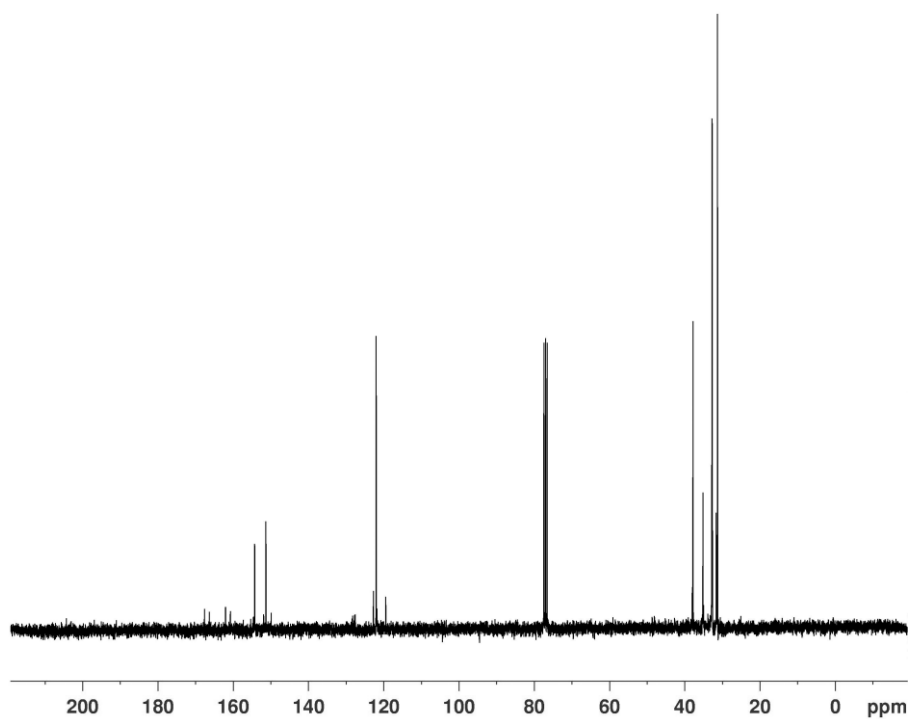

$^{13}\text{C}\{^1\text{H}\}$  NMR (75 MHz,  $\text{CDCl}_3$ ) of **1**

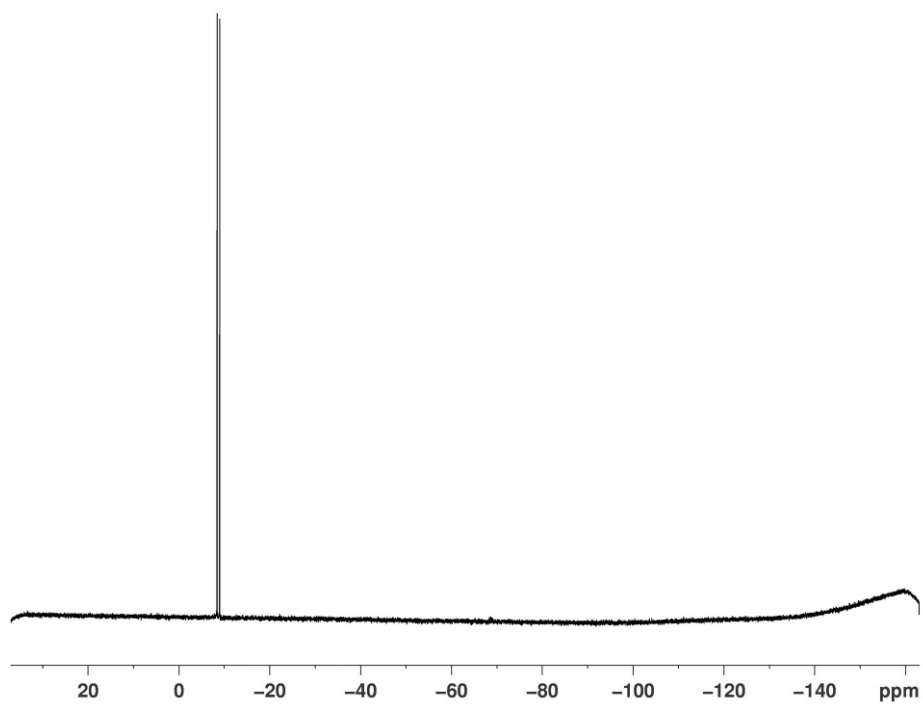

$^{19}\text{F}$  NMR (282 MHz,  $\text{CDCl}_3$ ) of **1**

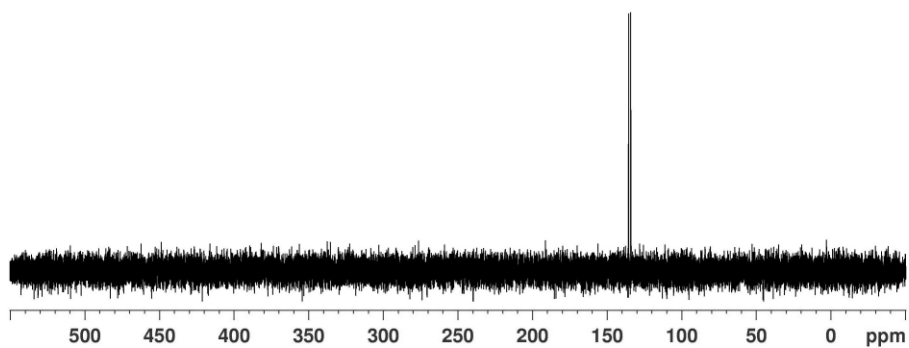

$^{31}\text{P}\{^1\text{H}\}$  NMR (121 MHz,  $\text{CDCl}_3$ ) of **1**



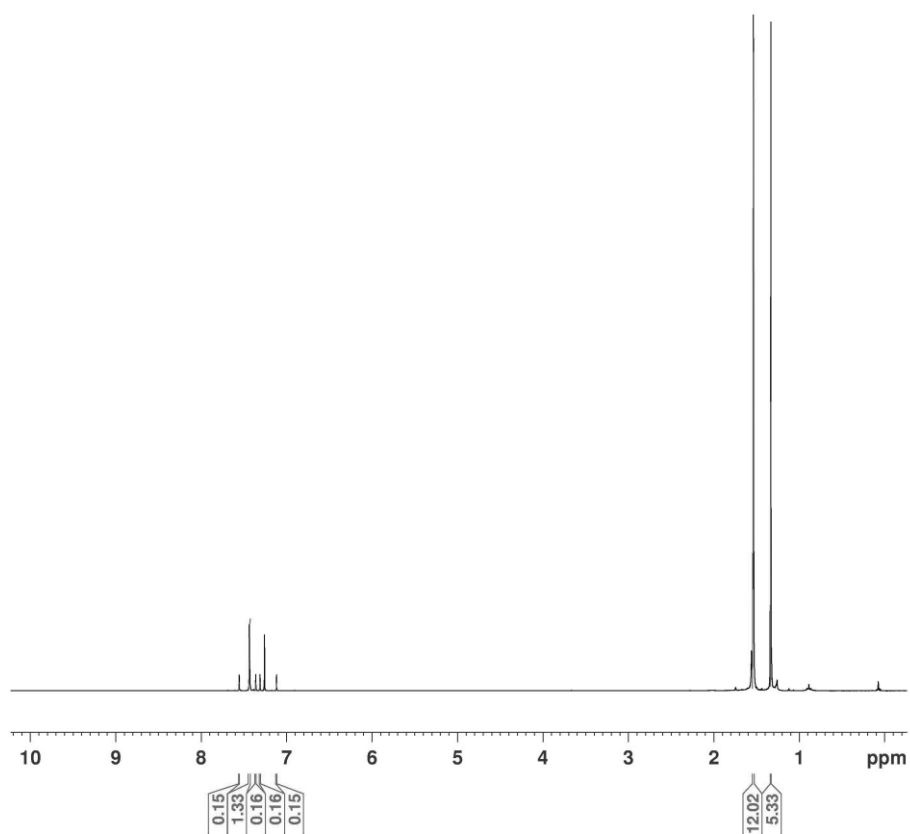

$^1\text{H}$  NMR (300 MHz,  $\text{CDCl}_3$ ) of **3**

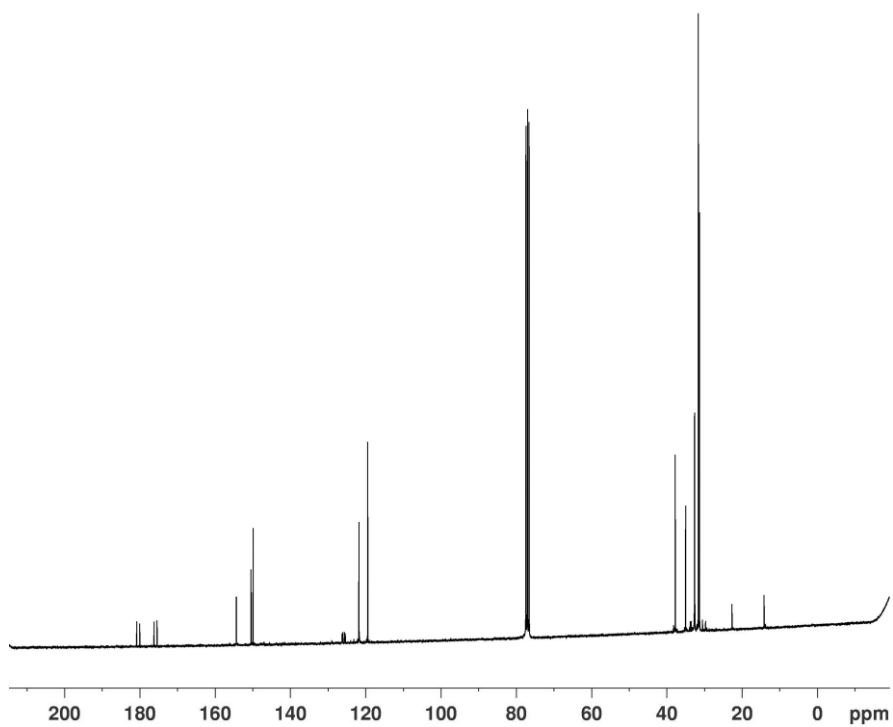

$^{13}\text{C}\{^1\text{H}\}$  NMR (75 MHz,  $\text{CDCl}_3$ ) of **3**

(A mixture with Mes\*H)

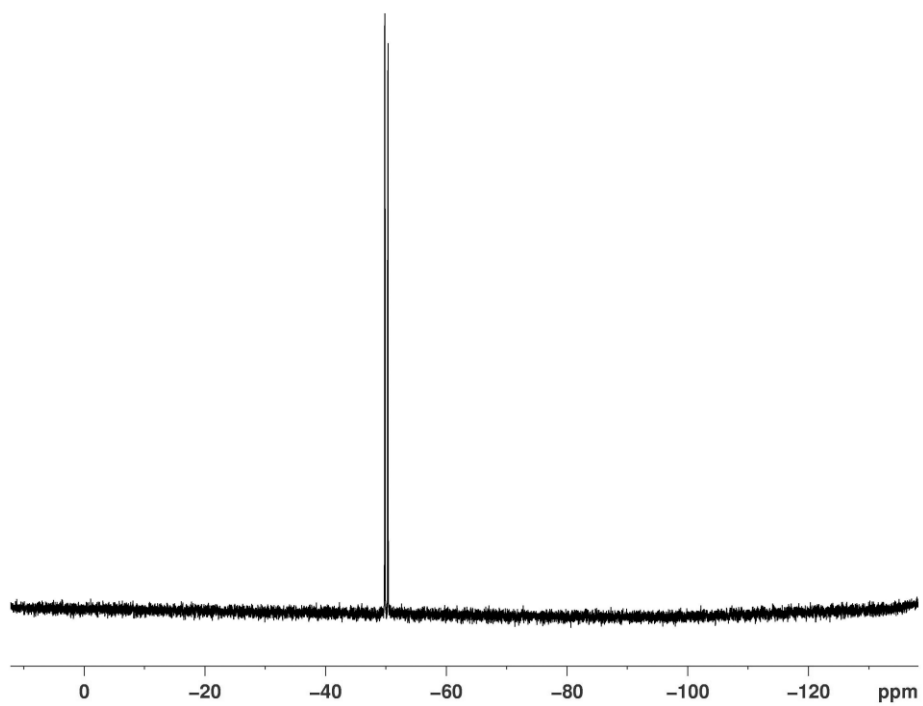

$^{19}\text{F}$  NMR (282 MHz,  $\text{CDCl}_3$ ) of **3**

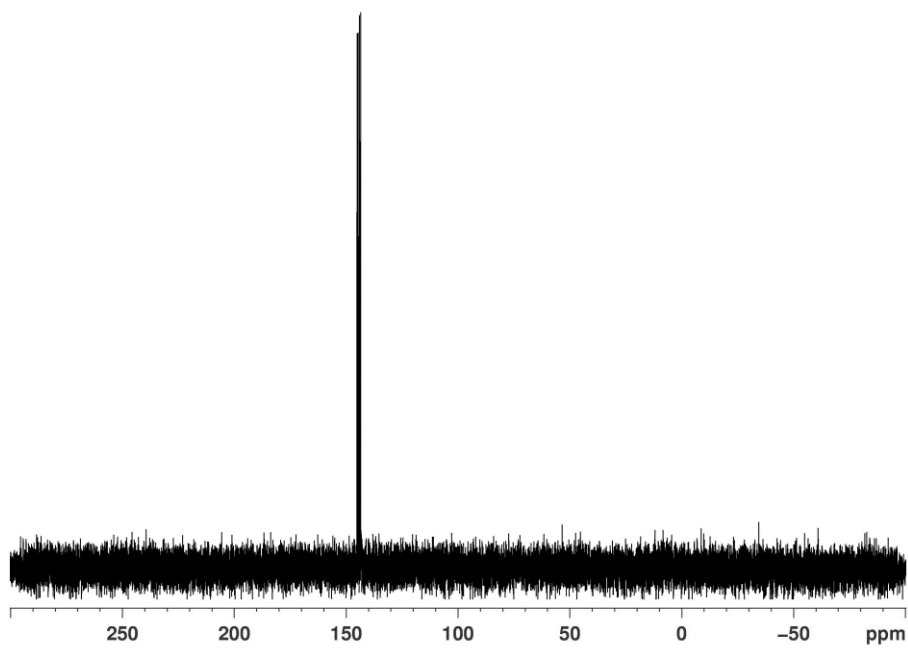

$^{31}\text{P}\{^1\text{H}\}$  NMR (121 MHz,  $\text{CDCl}_3$ ) of **3**

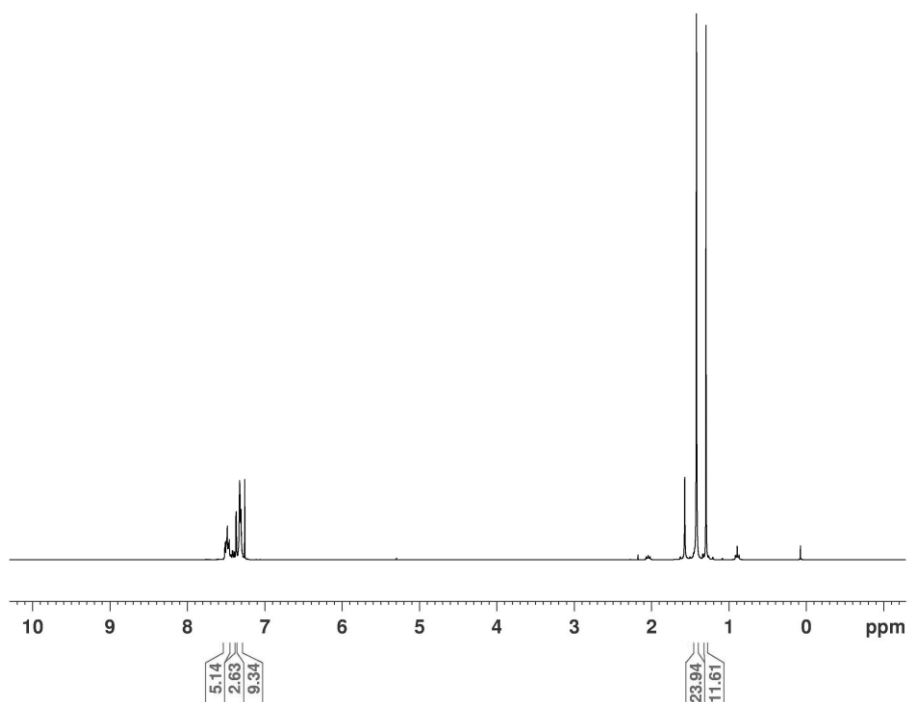

$^1\text{H}$  NMR (300 MHz,  $\text{CDCl}_3$ ) of **4**

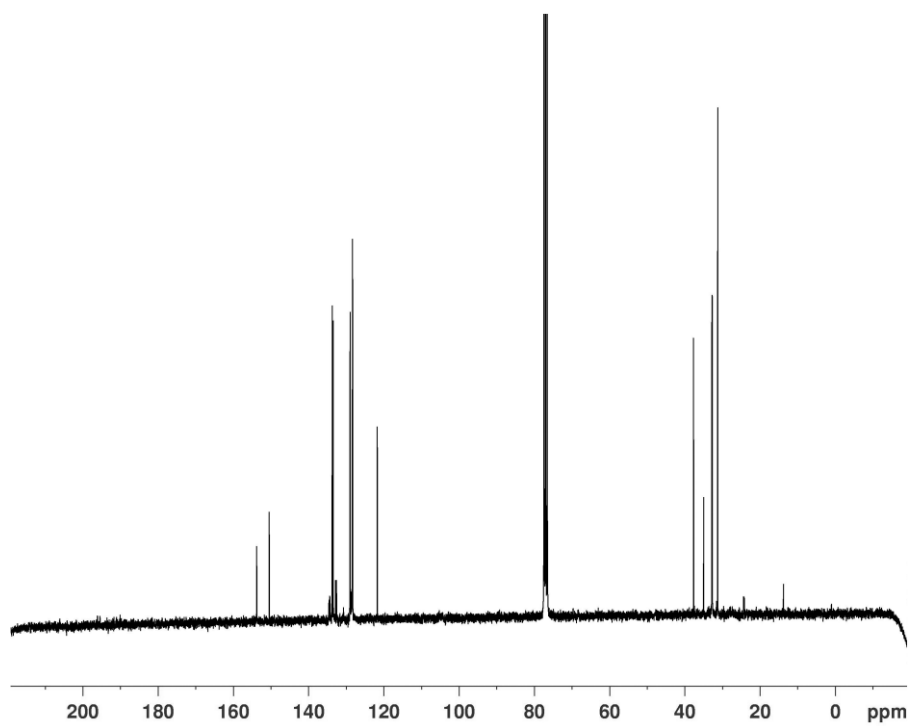

$^{13}\text{C}\{^1\text{H}\}$  NMR (75 MHz,  $\text{CDCl}_3$ ) of **4**

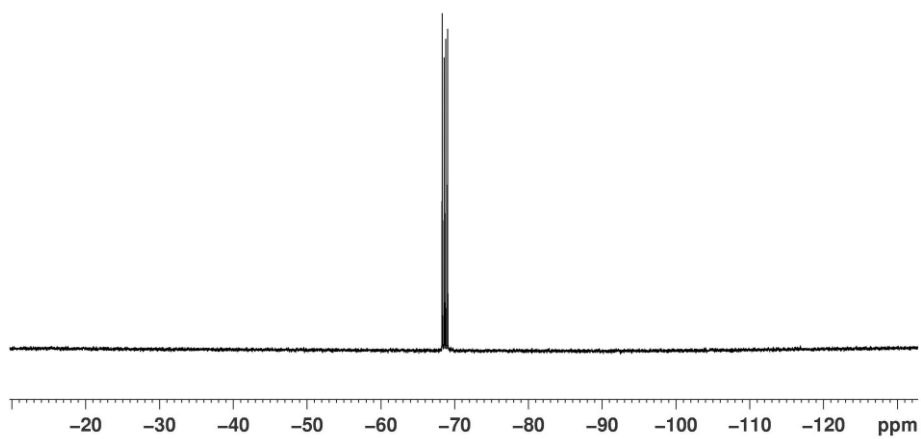

$^{19}\text{F}$  NMR (282 MHz,  $\text{CDCl}_3$ ) of **4**

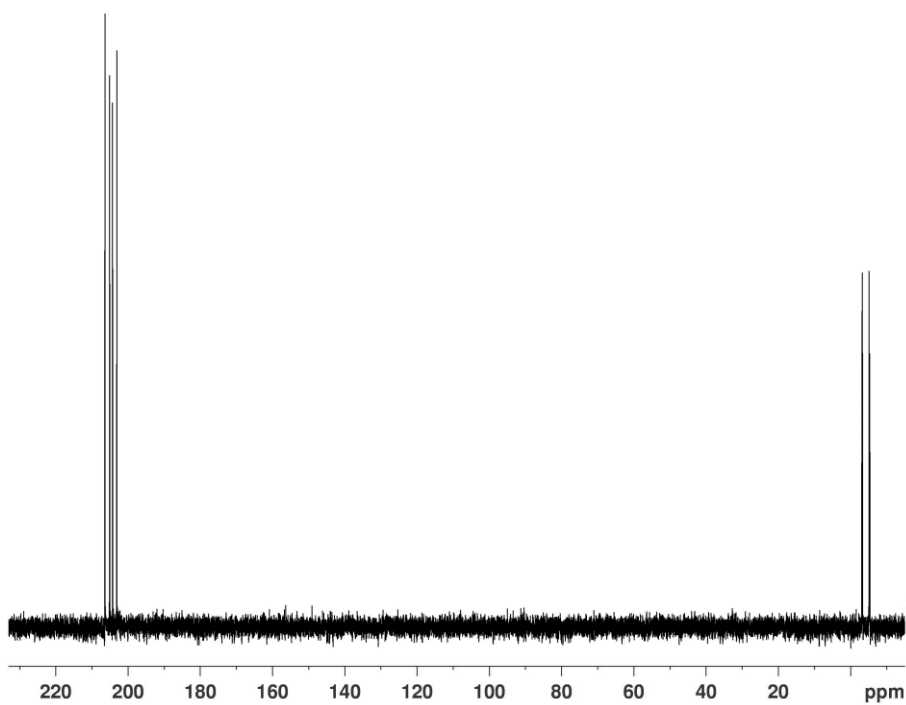

$^{31}\text{P}\{^1\text{H}\}$  NMR (121 MHz,  $\text{CDCl}_3$ ) of **4**

## 6. NMR Relaxation Study

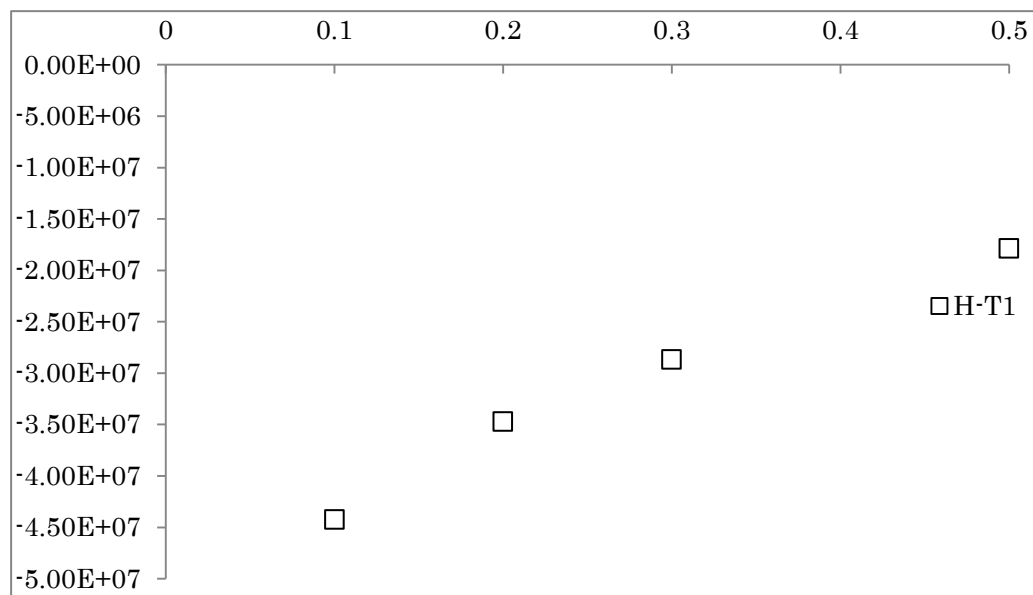

Time dependence of signal intensities of H of **3** using inversion recovery pulse sequence. ( $^1\text{H}$  NMR/300 MHz/ offset; 7.4 ppm/ sweep; 20 ppm/ points; 4/ solvent;  $\text{CDCl}_3$ / scans; 4 times)

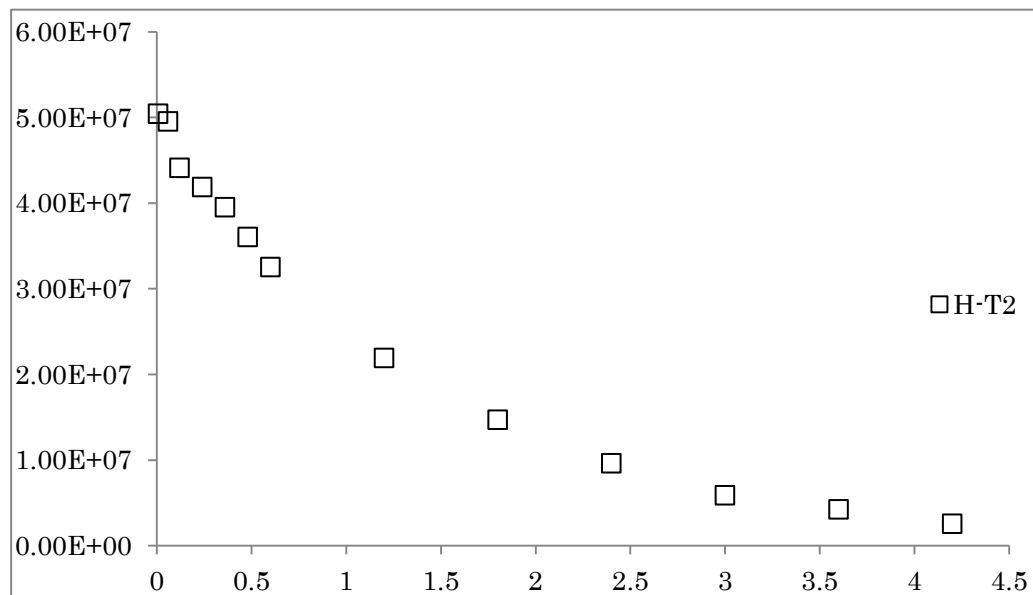

Time dependence of signal intensities of H of **3** using inversion CPMG pulse sequence. ( $^1\text{H}$  NMR/300 MHz/ offset; 7.4 ppm/ sweep; 20 ppm/ points; 16/ solvent;  $\text{CDCl}_3$ / scans; 4 times)

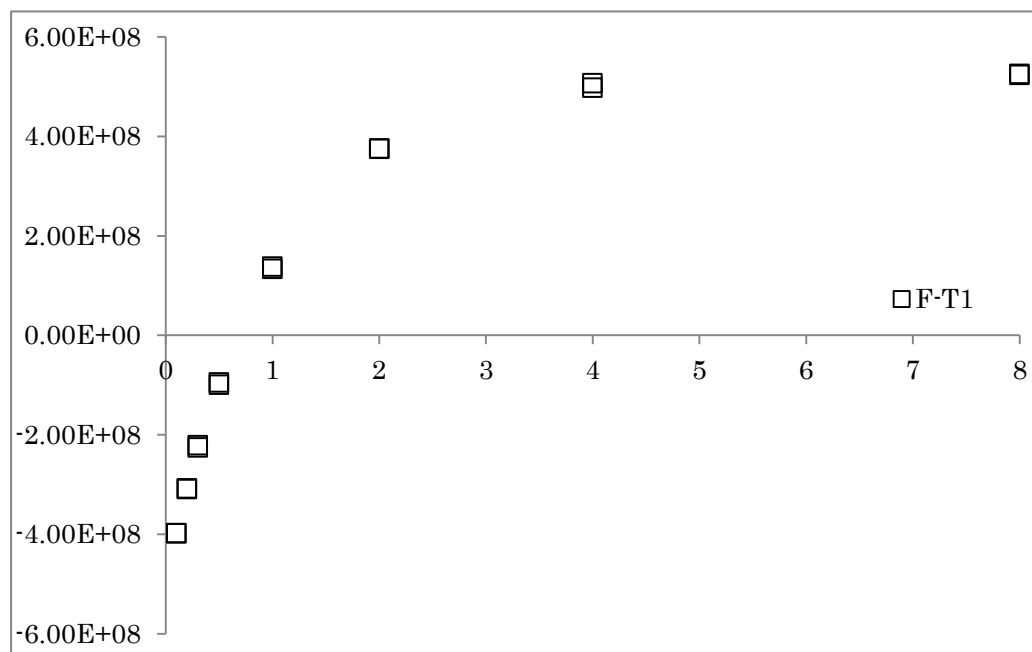

Time dependence of signal intensities of F of **3** using inversion recovery pulse sequence. ( $^{19}\text{F}$  NMR/282 MHz/ offset;  $-68.6$  ppm/ sweep; 20 ppm/ points; 16/ solvent;  $\text{CDCl}_3$ / scans; 2 times)

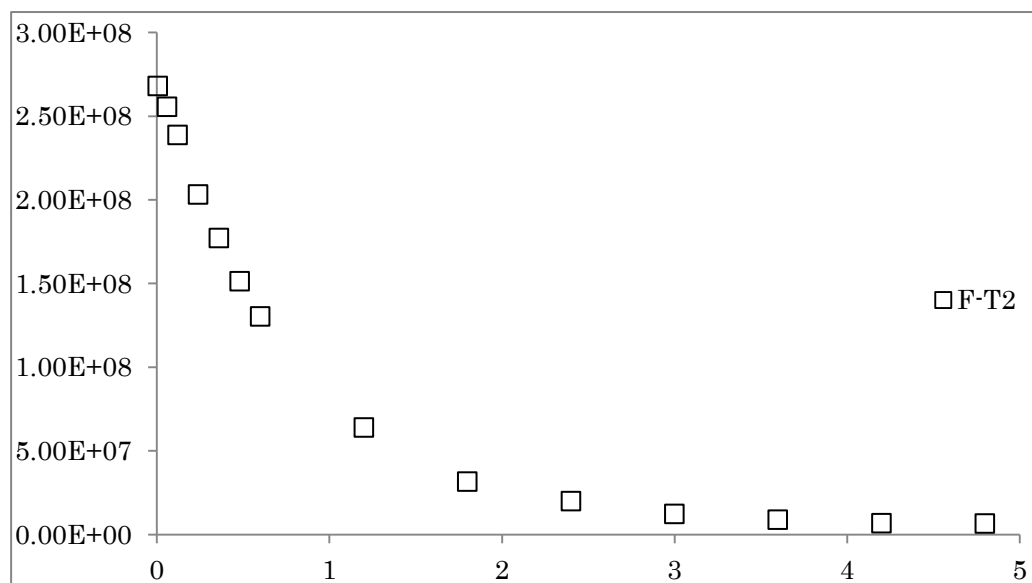

Time dependence of signal intensities of F of **3** using inversion CPMG pulse sequence. ( $^{19}\text{F}$  NMR/282 MHz/ offset;  $-68.6$  ppm/ sweep; 20 ppm/ points; 32/ solvent;  $\text{CDCl}_3$ / scans; 2 times)

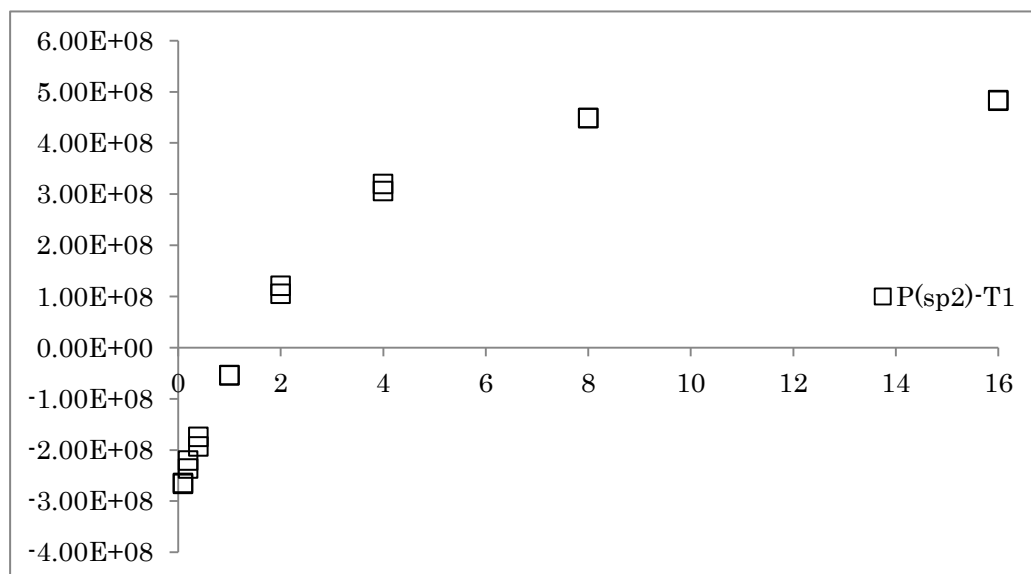

Time dependence of signal intensities of P of **3** using inversion recovery pulse sequence.

( $^{31}\text{P}\{^1\text{H}\}$  NMR/121.5 MHz/ offset; 144.3 ppm/ sweep; 20 ppm/ points; 16/ solvent;  $\text{CDCl}_3$ / scans; 4 times)

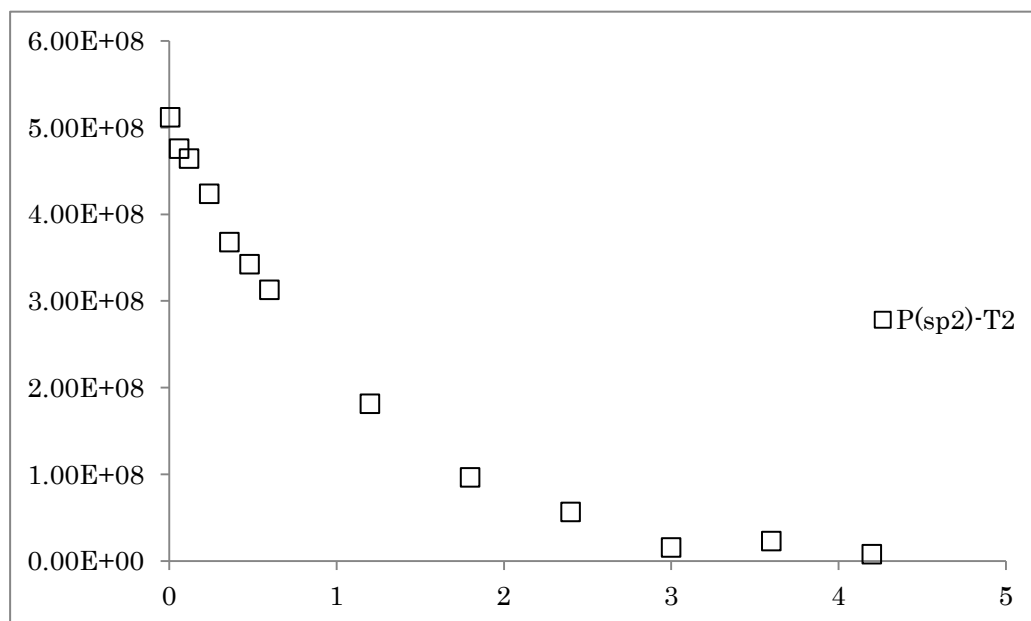

Time dependence of signal intensities of P of **3** using inversion CPMG pulse sequence.

( $^{31}\text{P}\{^1\text{H}\}$  NMR/121.5 MHz/ offset; 144.3 ppm/ sweep; 20 ppm/ points; 14/ solvent;  $\text{CDCl}_3$ / scans; 4 times)

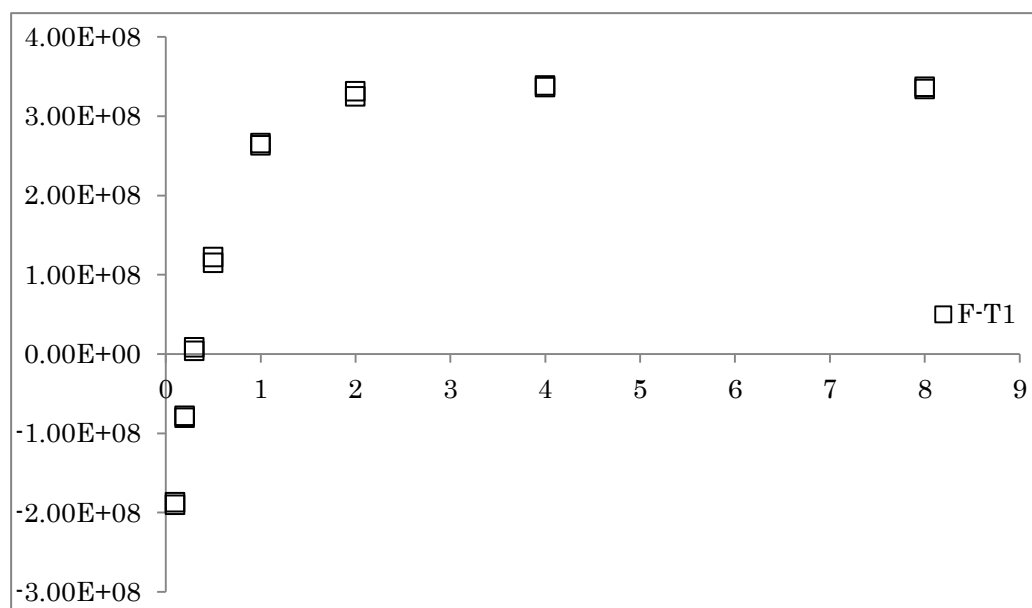

Time dependence of signal intensities of F of **4** using inversion recovery pulse sequence. ( $^{19}\text{F}$  NMR/282 MHz/ offset;  $-49.9$  ppm/ sweep; 20 ppm/ points; 16/ solvent;  $\text{CDCl}_3$ / scans; 3 times)

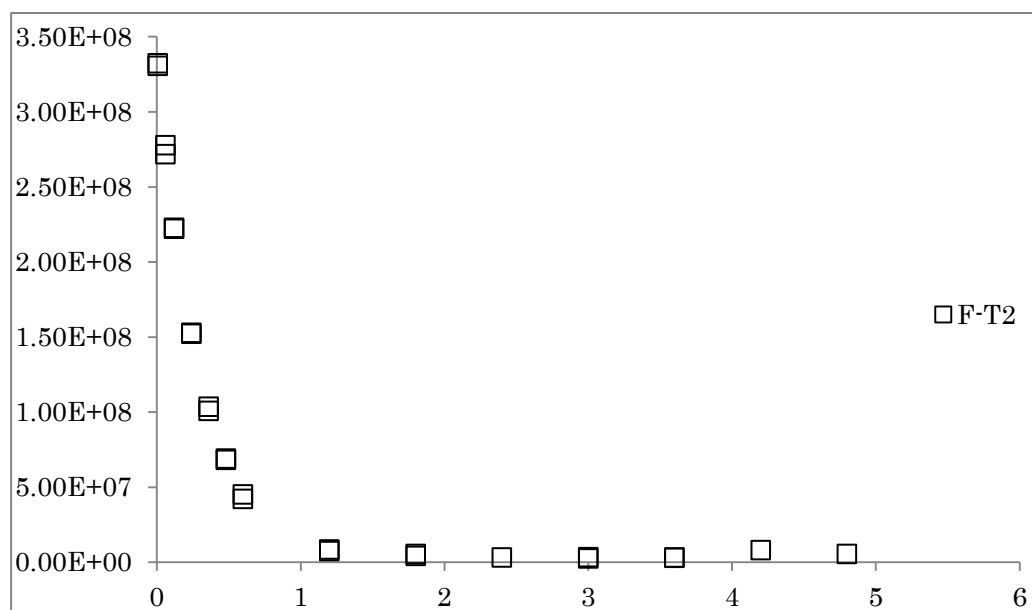

Time dependence of signal intensities of F of **4** using inversion CPMG pulse sequence. ( $^{19}\text{F}$  NMR/282 MHz/ offset; 204.4 ppm/ sweep; 20 ppm/ points; 32/ solvent;  $\text{CDCl}_3$ / scans; 3 times)



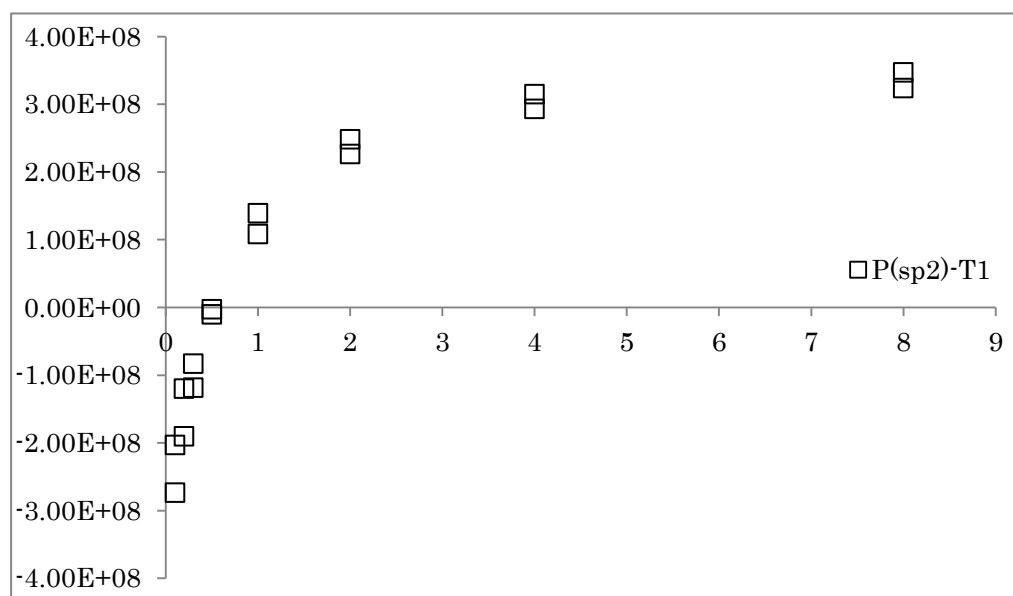

Time dependence of signal intensities of  $P^1$  ( $sp^2$ ) of **4** using inversion recovery pulse sequence. ( $^{31}P\{^1H\}$  NMR/121.5 MHz/ offset; 204.4 ppm/ sweep; 20 ppm/ points; 16/ solvent;  $CDCl_3$ / scans; 2 times)

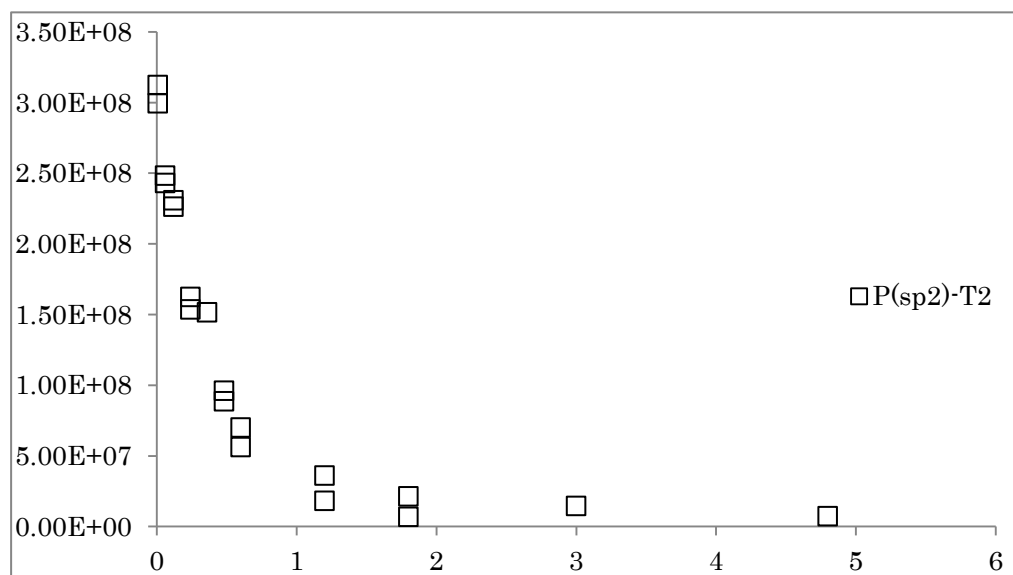

Time dependence of signal intensities of  $P^1$  of **4** ( $sp^2$ ) using inversion CPMG pulse sequence. ( $^{31}P\{^1H\}$  NMR/121.5 MHz/ offset; 204.4 ppm/ sweep; 20 ppm/ points; 26/ solvent;  $CDCl_3$ / scans; 2 times)

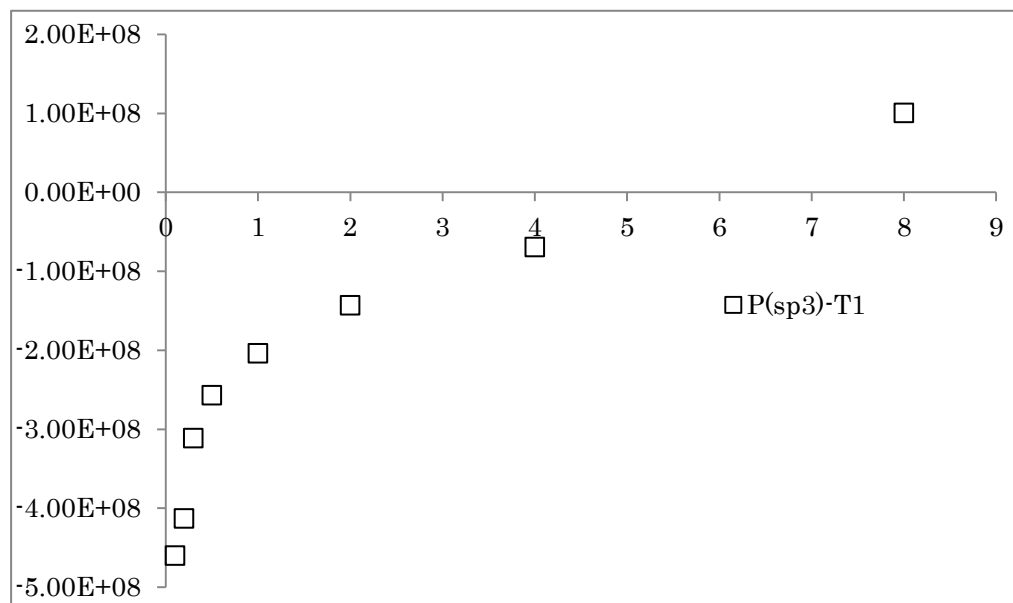

Time dependence of signal intensities of  $P^2$  ( $sp^3$ ) of **4** using inversion recovery pulse sequence. ( $^{31}P\{^1H\}$  NMR/121.5 MHz/ offset; -3.9 ppm/ sweep; 20 ppm/ points; 16/ solvent;  $CDCl_3$ / scans; 2 times)

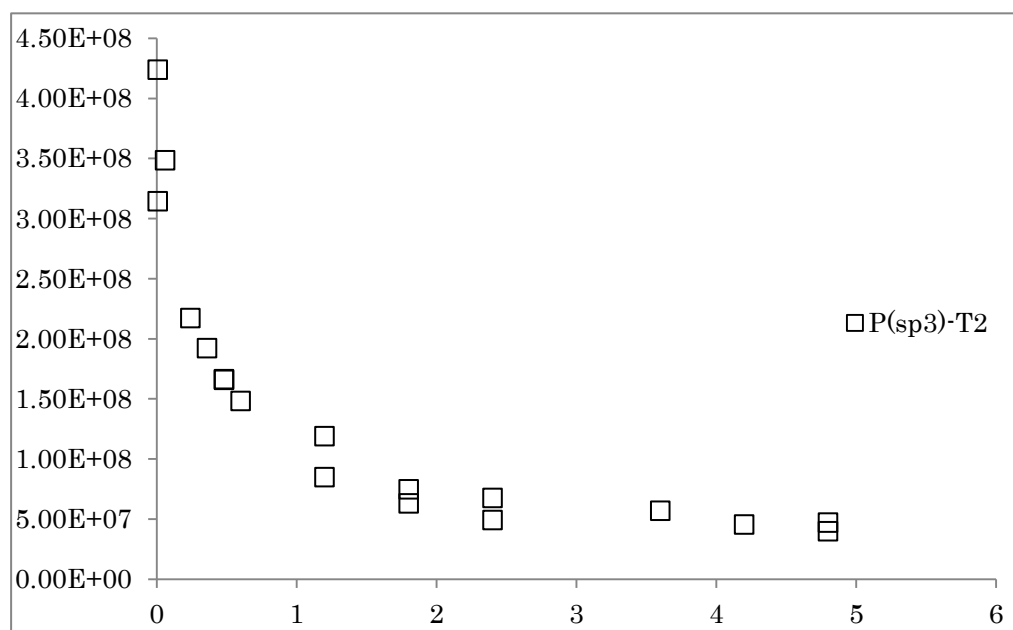

Time dependence of signal intensities of  $P^2$  ( $sp^3$ ) of **4** using inversion CPMG pulse sequence. ( $^{31}P\{^1H\}$  NMR/121.5 MHz/ offset; -3.9 ppm/ sweep; 20 ppm/ points; 28/ solvent;  $CDCl_3$ / scans; 2 times)

## References

- 1 G. Sheldrick and T. Schneider, *Methods Enzymol.*, 1997, **227**, 319.
- 2 Yadokari-XG, Software for Crystal Structure Analyses, K. Wakita (2001); Release of Software (Yadokari-XG 2009) for Crystal Structure Analyses, C. Kabuto, S. Akine, T. Nemoto and E. Kwon, *J. Cryst. Soc. Jpn.*, 2009, **51**, 218.
- 3 Gaussian09: M. J. Frisch, G. W. Trucks, H. B. Schlegel, G. E. Scuseria, M. A. Robb, J. R. Cheeseman, G. Scalmani, V. Barone, B. Mennucci, G. A. Petersson, H. Nakatsuji, M. Caricato, X. Li, H. P. Hratchian, A. F. Izmaylov, J. Bloino, G. Zheng, J. L. Sonnenberg, M. Hada, M. Ehara, K. Toyota, R. Fukuda, J. Hasegawa, M. Ishida, T. Nakajima, Y. Honda, O. Kitao, H. Nakai, T. Vreven, J. A. Montgomery, Jr., J. E. Peralta, F. Ogliaro, M. Bearpark, J. J. Heyd, E. Brothers, K. N. Kudin, V. N. Staroverov, T. Keith, R. Kobayashi, J. Normand, K. Raghavachari, A. Rendell, J. C. Burant, S. S. Iyengar, J. Tomasi, M. Cossi, N. Rega, J. M. Millam, M. Klene, J. E. Knox, J. B. Cross, V. Bakken, C. Adamo, J. Jaramillo, R. Gomperts, R. E. Stratmann, O. Yazyev, A. J. Austin, R. Cammi, C. Pomelli, J. W. Ochterski, R. L. Martin, K. Morokuma, V. G. Zakrzewski, G. A. Voth, P. Salvador, J. J. Dannenberg, S. Dapprich, A. D. Daniels, O. Farkas, J. B. Foresman, J. V. Ortiz and J. Cioslowski, D. J. Fox, Gaussian 09, Revision B.01, Gaussian, Inc., Wallingford CT, 2010.
- 4 H. H. Karsch, in *Synthetic Methods of Organometallic and Inorganic Chemistry* (W. A. Hermann Ed.), Thieme, Stuttgart, 1996.
- 5 S. Ito and M. Yoshifuji, *Chem. Commun.* 2001, 1208.
- 6 S. Ito, K. Nishide and M. Yoshifuji, *Organometallics*, 2006, **25**, 1424.
- 7 R. L. Vold, J. S. Waugh, M. P. Klein and D. E. Phelps, *J. Chem. Phys.*, 1968, **48**, 3831.
- 8 a) H. Y. Carr and E. M. Purcell, *Phys. Rev.*, 1954, **94**, 630; b) S. Meiboon and D. Gill, *Rev. Sci. Instrum.*, 1958, **29**, 688.
